1 **The novel reversible LSD1 inhibitor SP-2577 promotes anti-tumor immunity in**  
2 **SWItch/Sucrose-NonFermentable (SWI/SNF) complex mutated ovarian cancer**

3 Raffaella Soldi<sup>1</sup>, Tithi Ghosh Halder<sup>1</sup>, Alexis Weston<sup>1</sup>, Trason Thode<sup>1</sup>, Kevin Drenner<sup>1</sup>, Rhonda  
4 Lewis<sup>1</sup>, Mohan R. Kaadige<sup>1</sup>, Shreyesi Srivastava<sup>3</sup>, Sherin Daniel Ampanattu<sup>1</sup>, Ryan Rodriguez  
5 del Villar<sup>1</sup>, Jessica Lang<sup>2</sup>, Hariprasad Vankayalapati<sup>5</sup>, Bernard Weissman<sup>4</sup>, Jeffrey M. Trent<sup>2</sup>,  
6 William P.D. Hendricks<sup>2</sup> and Sunil Sharma<sup>1</sup>

7 <sup>1</sup>Applied Cancer Research and Drug Discovery, Translational Genomics Research Institute (TGen) of City of Hope, 445 N. 5th Street,  
8 Phoenix, AZ 85004

9 <sup>2</sup>Integrated Cancer Genomics Division, Translational Genomics Research Institute (TGen) of City of Hope, 445 N. 5th Street, Phoenix,  
10 AZ 85004

11 <sup>3</sup>HonorHealth Clinical Research Institute, 10510 N 92nd St Suite 200, Scottsdale, AZ 85258

12 <sup>4</sup>Department of Pathology and Laboratory Medicine, Lineberger Cancer Center, University of North Carolina, Chapel Hill, NC 27514

13 <sup>5</sup> Huntsman Cancer Institute, University of Utah, 2000 Circle of Hope, Salt Lake City, UT 84112, USA.

14

15 **Running title: SP-2577 and SWI/SNF mutated malignancies**

16 **To whom correspondence should be addressed: Dr. Sunil Sharma, Sunil Sharma, MD,**  
17 **FACP, MBA, Deputy Director, Clinical Sciences, Professor and Division Director, Applied**  
18 **Cancer Research and Drug Discovery, Translational Genomics Research Institute (TGen),**  
19 **445 N. Fifth Street, Phoenix, AZ 85004; T: 602-343-8402; F: 602-916-0602;**  
20 **ssharma@tgen.org**

21 **Keywords: SWI/SNF, SCCOHT, LSD1, SP-2577, Immune response, Checkpoint inhibitors,**  
22 **Cancer therapy.**

23

24 **Abstract**

25 Chromatin remodeling SWItch/Sucrose-NonFermentable (SWI/SNF) complexes, initially  
26 identified in yeast 20 years ago, are evolutionarily conserved multi-subunit protein complexes that

27 use the energy from hydrolysis of adenosine triphosphate (ATP) to remodel nucleosome structure  
28 and modulate transcription. Mutations in proteins of SWI/SNF complexes occur in 20% of human  
29 cancers including ovarian cancer (OC). Approximately 50% of ovarian clear cell carcinoma  
30 (OCCC) carries mutations in the SWI/SNF subunit ARID1A while small cell carcinoma of the ovary  
31 hypercalcemic type (SCCOHT) is driven primarily by genetic inactivation of the SWI/SNF ATPase  
32 SMARCA4 (BRG1) alongside epigenetic silencing of the homolog ATPase SMARCA2 (BRM).  
33 Dual loss of these ATPases disrupts SWI/SNF chromatin remodeling activity and may also  
34 interfere with the function of other histone-modifying enzymes that associate with or are  
35 dependent on SWI/SNF activity. One such enzyme is lysine-specific histone demethylase 1  
36 (LSD1/KDM1A) which regulates the chromatin landscape and gene expression by demethylating  
37 proteins, including histone H3. LSD1 associates with epigenetic complexes such as the  
38 nucleosome remodeling deacetylase complex (NuRD) and SWI/SNF to inhibit the transcription of  
39 genes involved in tumor suppression and cell differentiation. TCGA analysis of human cancers  
40 shows that LSD1 is highly expressed in SWI/SNF-mutated tumors. Further, SCCOHT and OCCC  
41 cell lines show low nM IC<sub>50</sub>s for the reversible LSD1 inhibitor SP-2577 (Seclidemstat, currently in  
42 clinical phase I trials), supporting that these SWI/SNF-deficient ovarian cancers are dependent  
43 on LSD1 activity. Recently, it has been also shown that inhibition of LSD1 stimulates interferon  
44 (IFN)-dependent anti-tumor immunity through induction of Endogenous Retroviruses Elements  
45 (ERVs) and may thereby overcome resistance to checkpoint blockade. Additionally, SCCOHTs  
46 have been shown to exhibit an immune-active tumor microenvironment with PD-L1 expression in  
47 both tumor and stromal cells that strongly correlated with T cell infiltration. Thus, in this study we  
48 investigated the ability of SP-2577 to promote anti-tumor immunity and T cell infiltration in  
49 SWI/SNF-mutant SCCOHT and OCCC models. Our data shows that the reversible LSD1 inhibitor  
50 SP-2577 stimulates IFN-dependent anti-tumor immunity in SCCOHT cells *in vitro* in a 3D immune-  
51 organoid platform. Additionally, SP-2577 promoted the expression of PD-L1 in both SCCOHT and

52 OCCC models. Together our findings suggest that SP-2577 and checkpoint inhibitors as a  
53 therapeutic combination may induce or augment immunogenic responses in these tumors.

54

## 55 **Introduction**

56 An increasing number of cancers are recognized to be driven partly by inactivation of  
57 subunits of the SWItch/Sucrose-NonFermentable (SWI/SNF) complex, a multi-protein ATP-  
58 dependent chromatin-remodeling complex with central roles in cell differentiation programs (1, 2).  
59 Pathogenic SWI/SNF mutations occur across diverse adult cancers, typically in a genomic  
60 background of numerous other driver mutations and/or genomic instability (3, 4). However,  
61 SWI/SNF driver mutations also occur in a unique subset of more uniform cancers, such as small  
62 cell carcinoma of the ovary hypercalcemic type (SCCOHT) (5), rhabdoid tumors (RT) (6, 7),  
63 thoracic sarcomas (8, 9), and renal medullary cancers (10). These cancers share genetic and  
64 phenotypic features even though they arise from different anatomic sites (1). Shared features  
65 include poorly differentiated morphology, occurrence in young populations, and clinically  
66 aggressive behavior (11, 12). Their genetic makeup is relatively simple, with an overall low tumor  
67 mutation burden, few structural defects, and, in most cases, universal inactivation of a single  
68 subunit in the SWI/SNF complex. Particularly, in ovarian cancers (OCs), the most lethal  
69 gynecologic malignancies in the developed world and the fifth leading cause of cancer-associated  
70 mortality among women in the United States (13), SWI/SNF alterations vary in different histologic  
71 subtypes. The ARID1A (BAF250a) subunit is mutated in approximately 50% of ovarian clear cell  
72 carcinomas (OCCC) and 30% of ovarian endometrioid carcinomas (OEC) (14). SCCOHT (15), a  
73 rare and very aggressive OC, is a single-gene disease with inactivating mutations in the subunit  
74 SMARCA4 (BRG1) (16-18) and epigenetic silencing of SMARCA2 (BRM) expression (17).  
75 SCCOHT is the most common undifferentiated ovarian malignant tumor in women under 40 years.  
76 In contrast, OCCC targets women aged 55 years or older and is characterized by mutations in  
77 phosphatidylinositol-4, 5-bisphosphate 3-kinase catalytic subunit  $\alpha$  (PIK3CA) (19, 20) and

78 phosphatase and tensin homolog (PTEN), in addition to the ARID1A mutations. Both SCCOHT  
79 and OCCC respond poorly to conventional chemotherapy, and to date there is no consensus on  
80 the optimal therapeutic strategy (5, 20-23).

81           ATP-dependent chromatin remodeling plays a critical role in cell differentiation through  
82 control of transcriptional programs. When disrupted, these programs result in abnormal gene  
83 expression that creates therapeutically targetable oncogenic dependencies (24). For example, in  
84 BRG1-deficient non-small cell lung cancers, BRM has been identified as a candidate synthetic  
85 lethal target (25, 26). Similarly, in BRG1-deficient small cell lung cancer, MYC-associated factor  
86 X (MAX) was identified as a synthetic lethal target (27). In ARID1A-mutated OC, inhibition of DNA  
87 repair proteins PARP and ATR, and the epigenetic factors EZH2, HDAC2, HDAC6 and BRD2  
88 have all shown therapeutic promise (28). In SCCOHT, therapeutic vulnerabilities to receptor  
89 tyrosine kinase inhibitors (29), EZH2 inhibitors (30-32), HDAC inhibitors (33), bromodomain  
90 inhibitors (34), and CDK4/6 inhibitors (35, 36) have also been identified. Importantly, correlations  
91 between SWI/SNF mutations and responses to immune checkpoint inhibitors have also been  
92 observed (37). In renal cell carcinoma, patients carrying mutations in bromodomain-containing  
93 genes (PBRM1 and BRD8) showed exceptional response to the anti-CTLA-4 antibody Ipilimumab  
94 (38). A CRISPR screen to identify genes involved in anti-PD-1 resistance identified three  
95 SWI/SNF complex members as important determinants in melanoma (39). A moderate response  
96 to anti-PD-1 treatment was also reported in a cohort of four SCCOHT patients expressing PD-L1  
97 (40), suggesting that the low tumor mutation burden is not a limitation for checkpoint  
98 immunotherapy. OCCC models have also recently been described to be responsive to checkpoint  
99 inhibition in combination with HDAC6 inhibitors, particularly in the ARID1A-deficient setting (41).  
100 In a Phase II clinical trial testing Nivolumab in platinum-refractory ovarian cancers, one of the two  
101 OCCC patients demonstrated a complete response (42). These data suggest that novel treatment  
102 approaches and combinations should be adopted to develop targeted therapies against  
103 SWI/SNF-mutant ovarian cancers.

104 LSD1 is an epigenetic enzyme that can either repress target gene expression by  
105 demethylating mono- or di-methylated histone H3 lysine 4 (H3K4me1/2) or activate targets by  
106 removing repressive H3K9me1/2. LSD1 is implicated in tumorigenesis and progression of many  
107 cancers and high LSD1 levels frequently correlate with aggressive cancer features (43-45). LSD1  
108 also promotes tumor progression through demethylation of non-histone substrates such as p53,  
109 E2F1, DNMT1, and MYPT1, a regulator of RB1 phosphorylation (46-50). Further, recent studies  
110 indicate that LSD1 ablation can trigger anti-tumor immunity through stimulation of expression of  
111 endogenous retroviral elements (ERVs) and downregulation of expression of the RNA-induced  
112 silencing complex (RISC). The accumulation of double-stranded RNA (dsRNA) results in the  
113 stimulation of interferon (IFN)  $\beta$ -dependent immunogenic responses (51). These studies also  
114 show that LSD1 inhibition overcomes resistance to checkpoint blockade therapy *in vivo* by  
115 increasing tumor immunogenicity and T cell infiltration (51-53). Several studies have shown  
116 interaction between LSD1 and SWI/SNF complexes. In glioma, LSD1 is part of a co-repressor  
117 complex containing TLX, RCOR2 and the SWI/SNF core complex. Together, this co-repressor  
118 complex regulates stem-like properties of glioma initiating cells (GICs) (54). When associated with  
119 SWI/SNF, CoREST, HDAC1/2 and DNMTs, LSD1 regulates gene expression in the neural  
120 network underlying neurodegenerative diseases and brain tumors (55). In breast cancer, LSD1  
121 associates with the SWI/SNF subunit SMARCA4 to form a hormone-dependent transcriptional  
122 repressor complex (56). A similar association is required for endogenous Notch-target gene  
123 expression in T-ALL cells (57). These findings suggest LSD1 as an important therapeutic target  
124 in cancers driven by SWI/SNF mutations.

125 In this study, we explored the therapeutic potential of SP-2577 (Secclidemstat, Salaris  
126 Pharmaceuticals, Houston TX), a potent reversible LSD1 inhibitor currently in Phase I clinical  
127 trials for Ewing Sarcoma (NCT03600649) and for advanced solid tumors (NCT03895684), to  
128 promote anti-tumor immunity and T cell infiltration in SWI/SNF-mutant OC. Our findings show that  
129 SP-2577 promotes ERV expression, activates the dsRNA-induced IFN pathway, and enhances T

130 cell infiltration in SCCOHT. Treatment with SP-2577 also promotes PD-L1 expression, and thus  
131 can potentially overcome resistance to anti-PD-1 therapy in SCCOHT. Finally, the efficacy of SP-  
132 2577 to promote T cell infiltration is not exclusive to SCCOHT. We observed similar effects in  
133 other SWI/SNF mutation-dependent OCs, such as ARID1A-mutant OCCC. Our data strongly  
134 suggest LSD1 as a potential therapeutic target in SCCOHT and provides preclinical evidence  
135 supporting the combinatorial use of SP-2577 with anti-PD-L1 for SWI/SNF-mutation-dependent  
136 OCs.

137

## 138 **Materials and Methods**

### 139 **Cell Lines and 2D Culture Maintenance**

140 SCCOHT cell lines BIN67 and SCCOHT-1 (Generously donated by Dr. William Hendrick, TGen)  
141 were cultured in RPMI Medium 1640 with L-Glutamine (Gibco) and supplemented with 10% FBS  
142 (Gibco) and 1% penicillin/streptomycin (Gibco). SCCOHT cell line COV434 (Generously donated  
143 by Dr. William Hendricks, TGen), OCCC cell line TOV21G (ATCC), and the doxycycline-inducible  
144 COV434 pIND20 BRG1-2.7 and TOV21G pIND20 ARID1A (generously donated by Dr. Bernard  
145 Weissman, University of North Carolina) were cultured in DMEM (Gibco) and supplemented with  
146 10% TET free FBS (Corning) and 1% penicillin/streptomycin (Gibco). All cells were maintained at  
147 37°C in a humidified incubator containing 5% CO<sub>2</sub>. All cell lines were routinely monitored for  
148 mycoplasma testing and STR profiled for cell line verification.

### 149 **The LSD1 screening biochemical assay**

150 The LSD1 screening biochemical assay was performed as previously described (58). Briefly, the  
151 LSD1 biochemical kit was purchased from Cayman Chemical (Ann Arbor, MI). SP-2577 and SP-  
152 2513 were diluted to 20X the desired test concentration in 100% DMSO and 2.5 µL of the diluted  
153 drug sample was added to a black 384-well plate. The LSD1 enzyme stock was diluted 17-fold

154 with assay buffer and 40  $\mu$ L of the diluted LSD1 enzyme was added to the appropriate wells.  
155 Substrate, consisting of horseradish peroxidase, dimethyl K4 peptide corresponding to the first  
156 21 amino acids of the N-terminal tail of histone H3, and 10-acetyl-3, 7-dihydroxyphenoxazine was  
157 then added to wells. Resorufin was analyzed on an Envision plate reader with an excitation  
158 wavelength of 530 nm and an emission wavelength of 595 nm.

### 159 **Cell Viability Assay**

160 Cells were seeded in 96-well plates in triplicate at a density of 500 to 2,000 cells per well  
161 depending on the growth curve of each cell line. 24 h later, cells were treated with DMSO, LSD1  
162 inhibitor SP-2577, or analog SP-2513 at increasing concentrations (0.001 to 10  $\mu$ M). Cell viability  
163 was assessed with CellTiter-Glo (Promega) 72 h after treatment and IC<sub>50</sub>s were calculated using  
164 GraphPad Prism 8.0.

### 165 **Organoid Generation**

166 SCCOHT cell lines (BIN67, SCCOHT-1, COV434) and the OCCC cell line TOV21G were seeded  
167 at 5000 cells per well in 96 well ultra-low attachment treated spheroid microplates (Corning) with  
168 the appropriate phenol red free medium containing 1.5% matrigel (Corning). Cells were  
169 maintained in culture for 72 h to generate spheroids for use in immune infiltration assays.

### 170 **Immune Infiltration Assay**

171 *SP-2577/SP-2513 Conditioned Media:*

172 The SCCOHT and OCCC cell lines were seeded in T-25 tissue culture treated flasks (Thermo  
173 Fisher) at  $3 \times 10^5$  cells in 5mL of the appropriate phenol red free complete growth medium. After  
174 48 h, at 70-80% confluency, the cells were treated with 3 $\mu$ M or 1 $\mu$ M of SP-2577 or SP-2513. After  
175 72 h, the media was collected from the flasks and stored at -80°C until use in the infiltration  
176 assays.

177 *Labeling PBMCs with RFP:*

178 Peripheral blood mononuclear cells (PBMC) (Lonza) were maintained in CTS OpTmizer T Cell  
179 expansion SFM (Thermo Fisher) in a T-75 suspension flask (Genesee Scientific) for 24 h at 37°C.  
180 After 24 h, cells were collected and washed with PBS (Gibco) and counted. Approximately 2.5  
181  $\times 10^6$  PBMCs were labeled with Molecular Probes Vybrant CM-Dil Cell Labeling Solution  
182 (RFP)(Invitrogen) by incubating the PBMCs with a 2  $\mu$ M solution of CM-Dil for 45 min at 37°C in  
183 the dark and then for an additional 15 min at 4°C. After the incubation, cells were washed with  
184 PBS twice and resuspended in the appropriate complete growth medium.

185 *Checkpoint blockade:*

186 The following monoclonal blocking antibodies (final concentration 10  $\mu$ g/mL) were used for  
187 checkpoint blocking on tumors as well as T cells: functional grade PD-L1 (29E.2A3) and CTLA-4  
188 (BN13) (Bioxcell, USA). In brief, 2  $\times 10^6$  PBMCs were treated with 10 $\mu$ g/mL of  $\alpha$ -CTLA-4 antibody  
189 and incubated at 37°C incubator for 45 min on shaker. Then the cells were washed in serum free  
190 media and stained with Molecular Probes Vybrant CM-Dil Cell Labeling Solution as mentioned  
191 above. Alternatively, COV434 tumor organoids were incubated with 10  $\mu$ g/mL of  $\alpha$ -PD-L1  
192 antibody and incubated at 37°C incubator for 1h. Then the media containing  $\alpha$ -PD-L1 was  
193 removed carefully and fresh conditioned media was added on all organoids.

194 *Immune infiltration and imaging:*

195 150 $\mu$ L of SP-2577 conditioned medium was added to each well containing a spheroid. A 5  $\mu$ m  
196 HTS Transwell-96 Well permeable support receiver plate (Corning) was placed on each ultra-low  
197 attachment spheroid microplate (Corning) to allow for PBMC infiltration into the tumoroids. RFP-  
198 stained PBMCs were then seeded into inserts at 5  $\times 10^5$  cells/well to ensure tumoroid:PBMC cell  
199 ratio of 1:10. After 48 h, inserts were removed, and organoid microplates were analyzed by 3D Z-



200 stack imaging and morphometric analysis with Cytation 5 software to quantify the lymphocyte  
201 infiltration.

## 202 **qPCR**

203 COV434, BIN67, and SCOOHT-1 cells were seeded at a  $1 \times 10^6$  cells in 2 mL in 6-well tissue  
204 culture treated plates (Corning). After 24 hrs, cells were treated with 1  $\mu$ M and 3  $\mu$ M of SP-2577  
205 as well as 3 $\mu$ M of SP-2513 for 72 h. DMSO was used as negative control. To quantify gene  
206 expression, total RNA was extracted (Qiagen RNeasy Mini Kit) and quantified by spectroscopy  
207 (Nanodrop ND-8000, Thermo Scientific). Samples were then reverse transcribed to cDNA using  
208 a high capacity cDNA reverse transcription kit (Applied Biosystems) and the MJ Research thermal  
209 cycler. cDNA was amplified, detected, and quantified using SYBR green reagents (Applied  
210 Biosystems) and the ViiA 7 Real-Time PCR System (Applied Biosystems). Data were normalized  
211 to GAPDH expression. List of primers used in this study are listed in Supplemental section.

## 212 **Fluorescent staining and imaging of Organoid**

213 Organoids grown in Matrigel were initially fixed in 4% PFA for 1.5 h. After PBS washing, organoids  
214 were embedded in Histogel, processed with an automated tissue processor (Tissue-Tek VIP),  
215 and embedded into a paraffin block (Tissue-Tek TEC). Samples were sectioned at 4  $\mu$ m onto  
216 poly-L-lysine coated slides and air-dried at room temperature overnight for any subsequent  
217 immunofluorescence staining. All slides for fluorescence were deparaffinized and antigen  
218 retrieved in pH 6 citrate buffer for a total of 40 min. After protein blocking, nuclei were stained with  
219 DAPI (Sigma). Infiltrating PBMCs were pre-stained with RFP as described previously. Imaging  
220 was performed on a Zeiss LSM880 fluorescent microscope with Zen Black software.

## 221 **Flow Cytometry and antibodies**

222 A digestion step was performed for the harvest and characterization of lymphocytes infiltrated into  
223 the organoids. After immune infiltration experiments, organoids were removed from culture insert,  
224 washed with PBS twice to eliminate the PBMCs not inside the organoids and incubated with  
225 Gentle Cell Dissociation reagent (Stem Cell Technologies) for 2 min at RT and mechanically  
226 disrupted by pipetting. After complete disaggregation, single cell suspensions were dissolved in  
227 Cell Staining buffer (Biolegend, San Diego, California) and incubated at 4°C for 10 min prior  
228 antibody staining.

229 Cells were stained for CD45 (Miltenyi Biotech), CD3, CD8, CD4, CD56, and CD19 (Biolegend).  
230 Cell viability was assessed by negative live/dead antibody staining (Miltenyi Biotech). Analysis  
231 was performed on a BD FACS Canto II (BD Biosciences). BV421+ and single cells were gated  
232 out, followed by CD45+ cell selection. Analysis of CD3, CD8, CD4, CD56, and CD19 lymphocyte  
233 populations was performed with FlowJo software (Tree Star Inc.)

#### 234 **Western Blot**

235 COV434 pIND20 BRG1-2.7 cells were plated in 6 well tissue culture plates at a density of  $5 \times 10^5$   
236 cells per well and left to adhere overnight. Once adherent, cells were treated with  $1 \mu\text{M}$  doxycycline  
237 (SIGMA) daily for 8 days. Cells were harvested daily and proteins were extracted from cell lysates  
238 and immunoblotted for SMARCA4 expression.

#### 239 **TCGA analysis**

240 TCGA PanCancer Atlas data was downloaded from cBioPortal. To identify SWI/SNF cancers  
241 cBioPortal was used to query samples with SMARCA4, ARID1A, SMARCB1, SMARCC1, and  
242 KDM1A mutations. Samples were removed that had only KDM1A mutations, KDM1A deletions,  
243 no profiling of SWI/SNF genes, or did not have expression data. Expression of KDM1A was  
244 plotted using RStudio.

## 245 **U-PLEX MSD analysis**

246 MSD analysis was performed following manufacturer protocol. Briefly, conditioned media (CM)  
247 from SP-2577 and DMSO treated cells were collected and centrifuged at 1500 RPM for 5 min at  
248 4°C to eliminate cell debris. CM was then concentrated using Centricon 10 KDa (Sigma) and 25  
249  $\mu$ L of the resulting CM was added in each well in the MSD plate (KIT #K15067L-2) and analyzed  
250 using Discovery Workbench 4.0 software.

## 251 **Statistical analysis**

252 Student's T-tests were performed using GraphPad Prism 8.0. Symbols for significance: NS, non-  
253 significant; \*= $p < 0.05$ ; \*\*= $p < 0.01$ ; \*\*\*\*= $p < 0.0001$ . All the *in vitro* experiments were performed in  
254 triplicate and repeated at least three times.

255

## 256 **Results**

257

258 *LSD1 is highly expressed in SWI/SNF-mutant cancers and the LSD1 inhibitor SP-2577 inhibits*  
259 *SWI/SNF-mutation-dependent tumor cell proliferation*

260 TGCA analysis using cBioPortal showed that LSD1 is highly expressed in the majority of  
261 human cancers, including in SWI/SNF-mutant tumors (59, 60) (Fig. 1 A and B). To determine the  
262 effects of SP-2577 on SWI/SNF-mutant cell viability, we performed drug-dose-response (DDR)  
263 studies with 72 h CellTiterGlo viability endpoints in SCCOHT (SMARCA4<sup>-/-</sup>), OCCC (ARID1A<sup>-/-</sup>),  
264 lung (SMARCA4<sup>-/-</sup>), kidney (SMARCB1<sup>-/-</sup>), and colorectal cancer cell lines (SMARCA4<sup>-/-</sup>). All cell  
265 lines were sensitive to the treatment and showed sub-micromolar IC<sub>50</sub>s (Table 1). SP-2513, an  
266 analog of SP-2577, which only poorly inhibits LSD1 enzymatic activity (Table 2), showed  
267 significantly higher 72 h IC<sub>50</sub>s that ranged from 3.5 to 10  $\mu$ M (Table 1).

268 *Inhibition of LSD1 by SP-2577 promotes ERV expression and induces expression and release of*  
269 *effector T cell attracting chemokines in conditioned medium*

270 Inhibition of LSD1 activity has been suggested to enhance anti-tumor immunity through  
271 activation of ERVs and production of dsRNA, followed by activation of an IFN- $\beta$ -dependent  
272 immune response (51). To investigate whether SP-2577 treatment could promote a similar  
273 response in SCCOHT tumors, we analyzed the expression of ERVL, HERVK, and IFN- $\beta$  in  
274 SCCOHT cell lines (COV434, BIN 67 and SCCOHT-1) treated with SP-2577. After 72 h treatment  
275 with 3 $\mu$ M SP-2577, quantitative PCR (qPCR) analysis showed that SP-2577 significantly  
276 upregulated the expression of ERVs, IFN- $\beta$ , and interferon-stimulated genes ISG15 and CXCL10,  
277 suggesting activation of an IFN-dependent immune response (Fig. 2A). Recently it has been  
278 shown that LSD1 inhibition in triple negative breast cancer cell lines induces expression of CD8<sup>+</sup>  
279 T cell-attracting chemokines including CCL5, CXCL9, and CXCL10 (61). The expression of these  
280 genes along with PD-L1 was shown to have increased H3K4me2 levels at proximal promoter  
281 regions (61) in response to LSD1 inhibition. To determine whether SCCOHT cell lines release  
282 CD8<sup>+</sup> T cell-attracting chemokines after LSD1 inhibition, we analyzed the conditioned media from  
283 COV434 cells treated with SP-2577 for 72 h. Our U-PLEX MSD data showed that treatment with  
284 SP-2577 stimulated chemokine secretion in COV434 culture medium (Fig. 2B). Further, secretion  
285 of cytokines including IL-1 $\beta$ , IL-2, and IL-8 were also observed in the treated conditioned medium.  
286 Together, these data suggest that SP-2577 may play a role in the promotion of anti-tumor  
287 immunity.

288

289 *SP-2577 promotes lymphocyte infiltration in 3D culture of SCCOHT cell lines*

290 To examine whether SP-2577-dependent cytokine and chemokine secretion could  
291 enhance lymphocyte trafficking and tumor infiltration, we carried out an *ex vivo*  
292 migration/infiltration assay. SCCOHT cell lines COV434, BIN67, and SCCOHT-1 were grown in

293 low concentration matrigel to form 3D organoids. To prevent SP-2577 cytotoxic damage from  
294 directly impacting cell viability, the organoids were cultured in conditioned media from SCCOHT  
295 cell lines collected 72 h post-treatment with SP-2577. At this time point there was no drug present  
296 in the conditioned medium. Migration and infiltration of lymphocytes was determined utilizing  
297 RFP-stained human allogeneic PBMCs. PBMCs were added to organoid cultures and migration  
298 toward the organoids was assessed by three dimensional Z-stack imaging and morphometric  
299 analysis (Cytation 5, BIOTECK). SP-2577 promoted PBMC infiltration in organoids more  
300 efficiently than the less active analog SP-2513 (Fig. 3A). Immunofluorescence analysis further  
301 demonstrated the presence of stained PBMCs in the sectioned organoids that were treated with  
302 SP-2577 conditioned medium while they were absent in organoids cultured in SP-2513 or DMSO-  
303 conditioned medium (Fig. 3B). Finally, to determine the dependency of PBMC infiltration on SP-  
304 2577, we performed *ex vivo* migration/infiltration studies with higher concentrations of the LSD1  
305 inhibitor (0.03 -3 $\mu$ M). SP-2577 induced PBMC infiltration into the SCCOHT organoids in a dose-  
306 dependent manner (Fig. 3C). Together, these observations suggest that the chemokines and  
307 cytokines secreted by SCCOHT cells in response to SP-2577 treatment promote the migration  
308 and infiltration of PBMCs in tumor organoids.

309

310 *Treatment with SP-2577 promotes infiltration of T cells CD8<sup>+</sup> into SCCOHT organoids.*

311 Next we investigated which lymphocyte populations infiltrated the in SCCOHT organoids  
312 after SP-2577 treatment *in vitro*. Flow cytometry analysis of the dissociated COV434 organoids  
313 shown the predominance of CD3<sup>+</sup> T lineage cells (Fig. 4 Ai, Bi). CD8<sup>+</sup> T cells percentile in SP-  
314 2577 treated organoids is highly significant compared to the untreated (Fig. 4 Aii, Bii). Similarly,  
315 CD4<sup>+</sup> and CD4<sup>+</sup>CD8<sup>+</sup> Double Positive T cells levels increased significantly after treatment with  
316 SP-2577 (Fig. 4 Aii, Bii). CD56<sup>+</sup> NKT cells and CD19<sup>+</sup> B cells were present in small percentile in  
317 the total CD45<sup>+</sup> cell population. CD56<sup>+</sup> NKT cells level increased approximately 15 folds after  
318 treatment with SP-2577 (Fig. 4 Aiii, Biii), while CD19<sup>+</sup> B cells decreased by approximately 3 folds

319 (Fig. 4 Aiv, Biv). All together these data suggest that treatment with SP-2577 promotes T cells  
320 and NKT cells infiltration into the tumor which leads to tumor cytotoxicity.

321

322

### 323 *Inhibition of LSD1 by SP-2577 induces expression of PD-L1*

324 LSD1 expression has been shown to negatively correlate with expression of immune-  
325 related genes including PD-L1 (61). Further, LSD1 has been shown to play a critical role in  
326 epigenetic silencing of the expression of PD-1 (62) and LSD1 inhibition results in increased  
327 expression of PD-L1 in tumor cells (51, 61). To investigate the effect of SP-2577-dependent LSD1  
328 inhibition on the expression of PD-L1 in SCCOHT, we treated COV434 organoids with 3  $\mu$ M SP-  
329 2577 and performed qPCR analysis for PD-L1 expression. We observed a significant increase in  
330 PD-L1 expression (Fig. 5A). Next, we tested if checkpoint blockade could amplify the immune cell  
331 infiltration effect in the presence of SP-2577 in immune-organoids. As shown in Fig. 5B, co-  
332 treatment of low doses (100 nM) of SP-2577 with  $\alpha$ -PD-L1 significantly increased lymphocyte  
333 infiltration. Moreover, the combination of  $\alpha$ -PD-L1 and  $\alpha$ -CTLA-4 was able to significantly enhance  
334 the infiltration of PBMCs in the SP-2577-treated COV434 organoids (Fig. 5B).

335

### 336 *SMARCA4 re-expression in SCCOHT cell lines blocks lymphocyte infiltration*

337 Although SCCOHT is characterized by low tumor mutation burden, recent studies have  
338 indicated that the tumor microenvironment of SCCOHT is similar to other immunogenic tumors  
339 that respond to checkpoint blockade (37, 40, 63), suggesting that mutations in the subunits of the  
340 SWI/SNF complex may contribute to immunotherapy sensitivity. We questioned whether the  
341 restoration of SWI/SNF functionality in SCCOHT would affect the lymphocyte trafficking and tumor  
342 infiltration observed with SP-2577 treatment. To investigate this hypothesis, we used an isogenic  
343 COV434 cell line (COV434 pIND20 BRG1 2.7) where SMARCA4 (*BRG1*) was re-expressed under  
344 a doxycycline inducible system (29). qPCR and Western blotting analysis confirmed the

345 expression of SMARCA4 in doxycycline-treated cells (Fig. 6A, B). SMARCA2 (*BRM*), which is  
346 normally silent in SCCOHT tumors, was also overexpressed by 14-fold after BRG1 induction (Fig.  
347 6B). We observed a significant reduction in the level of infiltrated lymphocytes in SMARCA4 re-  
348 expressed organoids after SP-2577 treatment (Fig. 6C). Remarkably, expression of ERVL,  
349 HERVK, IFN $\beta$ , as well as interferon-stimulated genes ISG15 and CXCL10 was significantly  
350 downregulated in SMARCA4-induced cells after treatment with SP-2577 (Fig. 6D). In addition, re-  
351 expression of SMARCA4 resulted in downregulation of PD-L1 expression in SCCOHT cell lines  
352 (Fig. 6E). Lastly, the production and secretion of cytokines and chemokines that were induced by  
353 SP-2577 treatment were negatively affected by the re-expression of SMARCA4 in SCCOHT cells  
354 (Fig. 6F).

355 To determine if the reduction of lymphocyte infiltration was solely dependent on the re-  
356 expression of SMARCA4, we cultured doxycycline treated COV434 pIND20 BRG1 2.7 organoids  
357 with conditioned medium generated from SP-2577-treated parental SCCOHT cells lacking  
358 SMARCA4 expression. As shown in Fig. 6G, the presence of cytokines and chemokines in SP-  
359 2577-treated conditioned medium was not sufficient to overcome the impaired infiltration of  
360 lymphocytes in SMARCA4-expressing organoids, suggesting that SMARCA4-dependent  
361 epigenetic changes may have altered the immunogenicity of the organoids.

362

### 363 *SP-2577 promotes lymphocyte infiltration in ARID1A deficient cells*

364 To investigate if SP-2577 promotes tumor immune response in other SWI/SNF-mutant  
365 tumor types, we performed *ex vivo* migration and infiltration of lymphocytes in ARID1A-deficient  
366 OCCC cells. These studies were conducted in isogenic TOV21G cells, which re-express ARID1A  
367 under the control of doxycycline treatment. As previously observed in SCCOHT cell lines, SP-  
368 2577 promotes lymphocyte infiltration in a dose-dependent manner in parental TOV21G  
369 organoids (Fig. 7A). Re-expression of ARID1A resulted in a significant reduction in infiltration of  
370 lymphocytes (Fig. 7B). In addition, the combination of  $\alpha$ -PD-L1 and  $\alpha$ -CTLA-4 was able to

371 significantly enhance the infiltration of PBMCs in the low dose (300 nM) SP-2577-treated parental  
372 TOV21G organoids (Fig. 7C).

373

374

## 375 **Discussion**

376 SWI/SNF complexes have previously been implicated in regulation of the immune system,  
377 particularly in enhancing interferon-stimulated gene (ISG) expression (64) through a STAT-  
378 dependent mechanism. However, it has been reported that inactivating mutations in SWI/SNF  
379 subunits (ARID1A, PBRM1, SMARCB1, and SMARCA4) also sensitize cancer cells to T cell-  
380 mediated destruction (37). SWI/SNF loss-of-function enhances the expression of immune  
381 checkpoint regulators and neoantigen presentation (37, 39, 65). Even monogenic tumors like  
382 SCCOHTs are immunogenic and exhibit biologically significant levels of T cell infiltration and PD-  
383 L1 expression (40). It has been reported that several patients with mutations in the SWI/SNF  
384 complex have benefited from checkpoint blockade immunotherapy (37, 39, 40). Although immune  
385 checkpoint inhibitor treatment has shown promising results, only a minority of treated patients  
386 exhibit durable responses (40, 66). Additionally, many of those who initially respond to treatment  
387 eventually experience relapse due to acquired resistance. As with conventional cancer therapies,  
388 one way to improve clinical responses with immune checkpoint blockade is through combination  
389 therapy strategies.

390 Numerous studies have revealed that epigenetic modulation plays a key role in tumor  
391 immune escape. Cancer cells show frequent loss or epigenetic silencing of the cytosolic DNA  
392 sensor cGAS and/or STING to promote immune evasion (67). Conversely, aberrant LSD1 activity  
393 suppresses the expression of immune protective factors (61) such as PD-L1 and CTLA-4.  
394 Recently, it has been shown that inhibition of LSD1 significantly increases tumor immunogenicity  
395 (51) primarily through changes in methylation levels. An increased methylation level promotes  
396 endogenous retroviral (ERV) expression, leading to dsRNA stress. Methylation of the RISC



397 complex member AGO2 results in destabilization of the integrity of complex and inhibition of  
398 dsRNA degradation. dsRNA stress activates IFN-dependent immune response that consequently  
399 sensitizes tumors to T cell immunity and T cell infiltration. As LSD1 is highly expressed in  
400 SCCOHT cell lines and interacts with members of the SWI/SNF complex to regulate gene  
401 expression (55, 68, 69), it is an ideal therapeutic target for the treatment of SCCOHT and  
402 potentially other SWI/SNF loss of function- dependent cancers.

403 In this study, we demonstrate that inhibition of LSD1 activity by the reversible inhibitor SP-  
404 2577 (Seclidemstat) induces the expression of ERVs and IFN $\beta$  in SCCOHT. In agreement with  
405 the previous observation that LSD1 negatively regulates expression of chemokines and immune  
406 protective factors such as PD-L1 (61), inhibition of LSD1 with SP-2577 promoted expression of  
407 chemokines and PD-L1 in SCCOHT cell lines, which results in activation of T cell infiltration.

408 The contribution of ERVs to the immune response is not limited to the dsRNA/MDA5  
409 interaction followed by activation of the IFN pathway. Tumor neoantigen analysis has shown that  
410 ERVs can encode for strictly tumor-specific antigens, otherwise silent in normal tissue, capable  
411 of eliciting T cell specific antitumor immunity. Schiavetti et al have shown that ERV-K antigens  
412 are highly expressed in a variety of malignancies such as breast, melanoma, sarcoma, lymphoma,  
413 and bladder cancer (70), and the ERV-E encoded antigen is selectively expressed in RCC kidney  
414 tumors (71). Moreover, it has been shown that in epithelial ovarian cancer and in colon cancer  
415 high levels of ERVs expression correlates robustly to immune checkpoint therapy response (72,  
416 73). Expression of ERV elements is subjected to genome-wide regulation by epigenetic silencing  
417 (74, 75). However, many ERVs are still transcribed in adult cells and contribute to autoimmune  
418 pathologies such as systemic lupus erythematosus and Aicardi–Goutières syndrome (76).  
419 Similarly, dysregulation of epigenetic pathways also contributes to reactivation of ERV elements  
420 in tumor cells (77).

421 SWI/SNF may play a role in the establishment of ERV silencing. In embryonic stem cells  
422 SMARCAD1, a SWI/SNF-like chromatin remodeler, negatively regulates the retrotransposon

423 activity through recruitment of KRAB associated protein 1 (KAP1) (78). Docking KAP1 at the ERV  
424 elements in the genome triggers the formation of a complex with the histone methyltransferase  
425 SETDB1, resulting in formation of H3K9me3 and silencing of ERV class I and II. Lack of  
426 SMARCAD1 compromises the stability of KAP1-SETDB1 association at ERVs, which lead to  
427 reduction of H3K9me3 and activation of ERV transcription. Restoration of SMARCAD1 activity  
428 reverses the ERV upregulation (78). Similarly, SWI/SNF complex members, including SMARCA4  
429 and LSH1, are known to ensure silencing of retrotransposons in the stem cells through interaction  
430 with DNMT3a and HDACs (75, 78). Transcriptome analysis of rhabdoid tumors cell lines with  
431 inducible SMARCB1 re-expression identified significant ERVs overexpression in SMARCB1-  
432 deficient conditions (79). In support of this, our studies show that re-expression of SMARCA4 in  
433 SCCOHT or ARID1A in OCCC results in the loss of ERV expression and reduction of T cell  
434 infiltration, even in the presence of conditioned medium enriched in cytokines and chemokines,  
435 implying that T cell infiltration may be related to the loss of SWI/SNF complex function.  
436 Together these results suggest that SWI/SNF deficiency plays a crucial role on ERVs epigenetic  
437 silencing, resulting in enhancement of tumor immunogenicity. Moreover, LSD1-dependent  
438 histone modifications result in significant downregulation of ERVs (74, 80). By inhibiting LSD1,  
439 SP-2577 ensures increased ERV activation and cytokine production, resulting in enhanced T cell  
440 immune response. In addition, SP-2577 treatment promotes PD-L1 expression, and co-treatment  
441 with  $\alpha$ -PD-L1 or  $\alpha$ -CTLA-4 antibodies significantly amplifies the CD8<sup>+</sup> T cell infiltration in SCCOHT  
442 and OCCC immune organoids.

443 Collectively, these findings demonstrate the important role of SP-2577 in the regulation of  
444 T cell recruitment to the tumor microenvironment and highlight the potential of combining SP-  
445 2577 with checkpoint immunotherapy in SCCOHT, OCCC, and other SWI/SNF mutated  
446 malignancies.

447

448 **Conflict of interest:** Dr. Sunil Sharma declares a financial interest in other companies doing  
449 research in cancer: Clinical research funding from Novartis, GSK, Millennium, MedImmune,  
450 Johnson & Johnson, Gilead Sciences, Plexxikon, Onyx, Bayer, Blueprint Medicines, XuanZhu,  
451 Incyte, Toray Industries, Celgene, Hengrui Therapeutics, OncoMed, Tesaro, AADi, Merck, Inhibrx  
452 Inc, AMAL Therapeutics, and Syndax. Equity from LSK BioPharma, Salaris Pharmaceuticals,  
453 Iterion Therapeutics, Proterus Therapeutics, ConverGene, and Stingray Therapeutics. Honoraria  
454 from Exelixis, Loxo Oncology, Natera Inc, Hengrui Therapeutics, Tarveda Therapeutics, Dracen  
455 Pharmaceuticals, and Barricade Therapeutics.

456 Dr. Raffaella Soldi holds stock in Salaris Pharmaceuticals.

457 The other authors declare that they have no conflict of interest with the contents of this article.

458

#### 459 **Author contributions:**

460 RS, TGH, AW and RRdV conducted the experiments, analyzed the results, and wrote most of the  
461 paper. KD performed the TGCA analysis. HV, MRK and WPDH provided advice on experimental  
462 design, interpretation of results and preparation of the manuscript. TT, RL, SHS, SDA, JL, BW  
463 and JMT provided advice on the preparation of the manuscript. SS conceived the idea for the  
464 project, provided advice on experimental design, interpretation of results and preparation of the  
465 manuscript.

466

#### 467 **References**

468 1. St Pierre R, Kadoch C. Mammalian SWI/SNF complexes in cancer: emerging therapeutic  
469 opportunities. *Curr Opin Genet Dev.* 2017;42:56-67.

- 470 2. Williams GM, Hume DM, Hudson RP, Jr., Morris PJ, Kano K, Milgrom F. "Hyperacute"  
471 renal-homograft rejection in man. *N Engl J Med.* 1968;279(12):611-8.
- 472 3. Brownlee PM, Meisenberg C, Downs JA. The SWI/SNF chromatin remodelling complex:  
473 Its role in maintaining genome stability and preventing tumourigenesis. *DNA Repair (Amst).*  
474 2015;32:127-33.
- 475 4. Dutta A, Sardu M, Gogol M, Gilmore J, Zhang D, Florens L, et al. Composition and  
476 Function of Mutant Swi/Snf Complexes. *Cell Rep.* 2017;18(9):2124-34.
- 477 5. Lu B, Shi H. An In-Depth Look at Small Cell Carcinoma of the Ovary, Hypercalcemic Type  
478 (SCCOHT): Clinical Implications from Recent Molecular Findings. *J Cancer.* 2019;10(1):223-37.
- 479 6. Agaimy A, Daum O, Markl B, Lichtmanegger I, Michal M, Hartmann A. SWI/SNF  
480 Complex-deficient Undifferentiated/Rhabdoid Carcinomas of the Gastrointestinal Tract: A Series  
481 of 13 Cases Highlighting Mutually Exclusive Loss of SMARCA4 and SMARCA2 and Frequent Co-  
482 inactivation of SMARCB1 and SMARCA2. *Am J Surg Pathol.* 2016;40(4):544-53.
- 483 7. Ramalingam P, Croce S, McCluggage WG. Loss of expression of SMARCA4 (BRG1),  
484 SMARCA2 (BRM) and SMARCB1 (INI1) in undifferentiated carcinoma of the endometrium is not  
485 uncommon and is not always associated with rhabdoid morphology. *Histopathology.*  
486 2017;70(3):359-66.
- 487 8. Matsushita M, Kuwamoto S. Cytologic Features of SMARCA4-Deficient Thoracic  
488 Sarcoma: A Case Report and Comparison with Other SWI/SNF Complex-Deficient Tumors. *Acta*  
489 *Cytol.* 2018;62(5-6):456-62.
- 490 9. Yoshida A, Kobayashi E, Kubo T, Kodaira M, Motoi T, Motoi N, et al. Clinicopathological  
491 and molecular characterization of SMARCA4-deficient thoracic sarcomas with comparison to  
492 potentially related entities. *Mod Pathol.* 2017;30(6):797-809.
- 493 10. Pawel BR. SMARCB1-deficient Tumors of Childhood: A Practical Guide. *Pediatr Dev*  
494 *Pathol.* 2018;21(1):6-28.

- 495 11. Biegel JA, Busse TM, Weissman BE. SWI/SNF chromatin remodeling complexes and  
496 cancer. *Am J Med Genet C Semin Med Genet.* 2014;166C(3):350-66.
- 497 12. Masliah-Planchon J, Bieche I, Guinebretiere JM, Bourdeaut F, Delattre O. SWI/SNF  
498 chromatin remodeling and human malignancies. *Annu Rev Pathol.* 2015;10:145-71.
- 499 13. Torre LA, Trabert B, DeSantis CE, Miller KD, Samimi G, Runowicz CD, et al. Ovarian  
500 cancer statistics, 2018. *CA Cancer J Clin.* 2018;68(4):284-96.
- 501 14. Kadoch C, Hargreaves DC, Hodges C, Elias L, Ho L, Ranish J, et al. Proteomic and  
502 bioinformatic analysis of mammalian SWI/SNF complexes identifies extensive roles in human  
503 malignancy. *Nat Genet.* 2013;45(6):592-601.
- 504 15. Fukumoto T, Magno E, Zhang R. SWI/SNF Complexes in Ovarian Cancer: Mechanistic  
505 Insights and Therapeutic Implications. *Mol Cancer Res.* 2018;16(12):1819-25.
- 506 16. Jelinic P, Mueller JJ, Olvera N, Dao F, Scott SN, Shah R, et al. Recurrent SMARCA4  
507 mutations in small cell carcinoma of the ovary. *Nat Genet.* 2014;46(5):424-6.
- 508 17. Karnezis AN, Wang Y, Ramos P, Hendricks WP, Oliva E, D'Angelo E, et al. Dual loss of  
509 the SWI/SNF complex ATPases SMARCA4/BRG1 and SMARCA2/BRM is highly sensitive and  
510 specific for small cell carcinoma of the ovary, hypercalcaemic type. *J Pathol.* 2016;238(3):389-  
511 400.
- 512 18. Patibandla JR, Fehniger JE, Levine DA, Jelinic P. Small cell cancers of the female genital  
513 tract: Molecular and clinical aspects. *Gynecol Oncol.* 2018;149(2):420-7.
- 514 19. Jones S, Wang TL, Shih le M, Mao TL, Nakayama K, Roden R, et al. Frequent mutations  
515 of chromatin remodeling gene ARID1A in ovarian clear cell carcinoma. *Science.*  
516 2010;330(6001):228-31.
- 517 20. Mabuchi S, Sugiyama T, Kimura T. Clear cell carcinoma of the ovary: molecular insights  
518 and future therapeutic perspectives. *J Gynecol Oncol.* 2016;27(3):e31.
- 519 21. del Carmen MG, Birrer M, Schorge JO. Clear cell carcinoma of the ovary: a review of the  
520 literature. *Gynecol Oncol.* 2012;126(3):481-90.

- 521 22. Qin Q, Ajewole VB, Sheu TG, Donohue R, Singh M. Successful treatment of a stage IIIC  
522 small-cell carcinoma of the ovary hypercalcemic subtype using multi-modality therapeutic  
523 approach. *Ecancermedicalsecience*. 2018;12:832.
- 524 23. Young RH, Oliva E, Scully RE. Small cell carcinoma of the ovary, hypercalcemic type. A  
525 clinicopathological analysis of 150 cases. *Am J Surg Pathol*. 1994;18(11):1102-16.
- 526 24. Mayes K, Qiu Z, Alhazmi A, Landry JW. ATP-dependent chromatin remodeling complexes  
527 as novel targets for cancer therapy. *Adv Cancer Res*. 2014;121:183-233.
- 528 25. Hoffman GR, Rahal R, Buxton F, Xiang K, McAllister G, Frias E, et al. Functional  
529 epigenetics approach identifies BRM/SMARCA2 as a critical synthetic lethal target in BRG1-  
530 deficient cancers. *Proc Natl Acad Sci U S A*. 2014;111(8):3128-33.
- 531 26. Oike T, Ogiwara H, Tominaga Y, Ito K, Ando O, Tsuta K, et al. A synthetic lethality-based  
532 strategy to treat cancers harboring a genetic deficiency in the chromatin remodeling factor BRG1.  
533 *Cancer Res*. 2013;73(17):5508-18.
- 534 27. Romero OA, Torres-Diz M, Pros E, Savola S, Gomez A, Moran S, et al. MAX inactivation  
535 in small cell lung cancer disrupts MYC-SWI/SNF programs and is synthetic lethal with BRG1.  
536 *Cancer Discov*. 2014;4(3):292-303.
- 537 28. Caumanns JJ, Wisman GBA, Berns K, van der Zee AGJ, de Jong S. ARID1A mutant  
538 ovarian clear cell carcinoma: A clear target for synthetic lethal strategies. *Biochim Biophys Acta*  
539 *Rev Cancer*. 2018;1870(2):176-84.
- 540 29. Lang JD, Hendricks WPD, Orlando KA, Yin H, Kiefer J, Ramos P, et al. Ponatinib Shows  
541 Potent Antitumor Activity in Small Cell Carcinoma of the Ovary Hypercalcemic Type (SCCOHT)  
542 through Multikinase Inhibition. *Clin Cancer Res*. 2018;24(8):1932-43.
- 543 30. Chan-Penebre E, Armstrong K, Drew A, Grassian AR, Feldman I, Knutson SK, et al.  
544 Selective Killing of SMARCA2- and SMARCA4-deficient Small Cell Carcinoma of the Ovary,  
545 Hypercalcemic Type Cells by Inhibition of EZH2: In Vitro and In Vivo Preclinical Models. *Mol*  
546 *Cancer Ther*. 2017;16(5):850-60.

- 547 31. Kim KH, Kim W, Howard TP, Vazquez F, Tsherniak A, Wu JN, et al. SWI/SNF-mutant  
548 cancers depend on catalytic and non-catalytic activity of EZH2. *Nat Med.* 2015;21(12):1491-6.
- 549 32. Wang Y, Chen SY, Karnezis AN, Colborne S, Santos ND, Lang JD, et al. The histone  
550 methyltransferase EZH2 is a therapeutic target in small cell carcinoma of the ovary,  
551 hypercalcaemic type. *J Pathol.* 2017;242(3):371-83.
- 552 33. Wang Y, Chen SY, Colborne S, Lambert G, Shin CY, Santos ND, et al. Histone  
553 Deacetylase Inhibitors Synergize with Catalytic Inhibitors of EZH2 to Exhibit Antitumor Activity in  
554 Small Cell Carcinoma of the Ovary, Hypercalcemic Type. *Mol Cancer Ther.* 2018;17(12):2767-  
555 79.
- 556 34. Shorstova T, Marques M, Su J, Johnston J, Kleinman CL, Hamel N, et al. SWI/SNF-  
557 Compromised Cancers Are Susceptible to Bromodomain Inhibitors. *Cancer Res.*  
558 2019;79(10):2761-74.
- 559 35. Xue Y, Meehan B, Fu Z, Wang XQD, Fiset PO, Rieker R, et al. SMARCA4 loss is synthetic  
560 lethal with CDK4/6 inhibition in non-small cell lung cancer. *Nat Commun.* 2019;10(1):557.
- 561 36. Xue Y, Meehan B, Macdonald E, Venneti S, Wang XQD, Witkowski L, et al. CDK4/6  
562 inhibitors target SMARCA4-determined cyclin D1 deficiency in hypercalcemic small cell  
563 carcinoma of the ovary. *Nat Commun.* 2019;10(1):558.
- 564 37. Miao D, Margolis CA, Gao W, Voss MH, Li W, Martini DJ, et al. Genomic correlates of  
565 response to immune checkpoint therapies in clear cell renal cell carcinoma. *Science.*  
566 2018;359(6377):801-6.
- 567 38. Motzer RJ, Tannir NM, McDermott DF, Aren Frontera O, Melichar B, Choueiri TK, et al.  
568 Nivolumab plus Ipilimumab versus Sunitinib in Advanced Renal-Cell Carcinoma. *N Engl J Med.*  
569 2018;378(14):1277-90.
- 570 39. Pan D, Kobayashi A, Jiang P, Ferrari de Andrade L, Tay RE, Luoma AM, et al. A major  
571 chromatin regulator determines resistance of tumor cells to T cell-mediated killing. *Science.*  
572 2018;359(6377):770-5.

- 573 40. Jelinic P, Ricca J, Van Oudenhove E, Olvera N, Merghoub T, Levine DA, et al. Immune-  
574 Active Microenvironment in Small Cell Carcinoma of the Ovary, Hypercalcemic Type: Rationale  
575 for Immune Checkpoint Blockade. *J Natl Cancer Inst.* 2018;110(7):787-90.
- 576 41. Fukumoto T, Fatkhutdinov N, Zundell JA, Tcyganov EN, Nacarelli T, Karakashev S, et al.  
577 HDAC6 Inhibition Synergizes with Anti-PD-L1 Therapy in ARID1A-Inactivated Ovarian Cancer.  
578 *Cancer Res.* 2019;79(21):5482-9.
- 579 42. Hamanishi J, Mandai M, Ikeda T, Minami M, Kawaguchi A, Murayama T, et al. Safety and  
580 Antitumor Activity of Anti-PD-1 Antibody, Nivolumab, in Patients With Platinum-Resistant Ovarian  
581 Cancer. *J Clin Oncol.* 2015;33(34):4015-22.
- 582 43. Ambrosio S, Sacca CD, Amente S, Paladino S, Lania L, Majello B. Lysine-specific  
583 demethylase LSD1 regulates autophagy in neuroblastoma through SESN2-dependent pathway.  
584 *Oncogene.* 2017;36(48):6701-11.
- 585 44. Amente S, Lania L, Majello B. The histone LSD1 demethylase in stemness and cancer  
586 transcription programs. *Biochim Biophys Acta.* 2013;1829(10):981-6.
- 587 45. Schulte JH, Lim S, Schramm A, Friedrichs N, Koster J, Versteeg R, et al. Lysine-specific  
588 demethylase 1 is strongly expressed in poorly differentiated neuroblastoma: implications for  
589 therapy. *Cancer Res.* 2009;69(5):2065-71.
- 590 46. Huang J, Sengupta R, Espejo AB, Lee MG, Dorsey JA, Richter M, et al. p53 is regulated  
591 by the lysine demethylase LSD1. *Nature.* 2007;449(7158):105-8.
- 592 47. Kontaki H, Talianidis I. Cross-talk between post-translational modifications regulate life or  
593 death decisions by E2F1. *Cell Cycle.* 2010;9(19):3836-7.
- 594 48. Kontaki H, Talianidis I. Lysine methylation regulates E2F1-induced cell death. *Mol Cell.*  
595 2010;39(1):152-60.
- 596 49. Scoumanne A, Chen X. The lysine-specific demethylase 1 is required for cell proliferation  
597 in both p53-dependent and -independent manners. *J Biol Chem.* 2007;282(21):15471-5.



- 598 50. Wang J, Hevi S, Kurash JK, Lei H, Gay F, Bajko J, et al. The lysine demethylase LSD1  
599 (KDM1) is required for maintenance of global DNA methylation. *Nat Genet.* 2009;41(1):125-9.
- 600 51. Sheng W, LaFleur MW, Nguyen TH, Chen S, Chakravarthy A, Conway JR, et al. LSD1  
601 Ablation Stimulates Anti-tumor Immunity and Enables Checkpoint Blockade. *Cell.*  
602 2018;174(3):549-63 e19.
- 603 52. Chen S, Lee LF, Fisher TS, Jessen B, Elliott M, Evering W, et al. Combination of 4-1BB  
604 agonist and PD-1 antagonist promotes antitumor effector/memory CD8 T cells in a poorly  
605 immunogenic tumor model. *Cancer Immunol Res.* 2015;3(2):149-60.
- 606 53. Juneja VR, McGuire KA, Manguso RT, LaFleur MW, Collins N, Haining WN, et al. PD-L1  
607 on tumor cells is sufficient for immune evasion in immunogenic tumors and inhibits CD8 T cell  
608 cytotoxicity. *J Exp Med.* 2017;214(4):895-904.
- 609 54. Hiramatsu H, Kobayashi K, Kobayashi K, Haraguchi T, Ino Y, Todo T, et al. The role of  
610 the SWI/SNF chromatin remodeling complex in maintaining the stemness of glioma initiating cells.  
611 *Sci Rep.* 2017;7(1):889.
- 612 55. Rossbach M. Non-Coding RNAs in Neural Networks, REST-Assured. *Front Genet.*  
613 2011;2:8.
- 614 56. Nacht AS, Pohl A, Zaurin R, Soronellas D, Quilez J, Sharma P, et al. Hormone-induced  
615 repression of genes requires BRG1-mediated H1.2 deposition at target promoters. *EMBO J.*  
616 2016;35(16):1822-43.
- 617 57. Yatim A, Benne C, Sobhian B, Laurent-Chabalier S, Deas O, Judde JG, et al. NOTCH1  
618 nuclear interactome reveals key regulators of its transcriptional activity and oncogenic function.  
619 *Mol Cell.* 2012;48(3):445-58.
- 620 58. Sorna V, Theisen ER, Stephens B, Warner SL, Bearss DJ, Vankayalapati H, et al. High-  
621 throughput virtual screening identifies novel N'-(1-phenylethylidene)-benzohydrazides as potent,  
622 specific, and reversible LSD1 inhibitors. *J Med Chem.* 2013;56(23):9496-508.

- 623 59. Cerami E, Gao J, Dogrusoz U, Gross BE, Sumer SO, Aksoy BA, et al. The cBio cancer  
624 genomics portal: an open platform for exploring multidimensional cancer genomics data. *Cancer*  
625 *Discov.* 2012;2(5):401-4.
- 626 60. Gao J, Aksoy BA, Dogrusoz U, Dresdner G, Gross B, Sumer SO, et al. Integrative analysis  
627 of complex cancer genomics and clinical profiles using the cBioPortal. *Sci Signal.*  
628 2013;6(269):pl1.
- 629 61. Qin Y, Vasilatos SN, Chen L, Wu H, Cao Z, Fu Y, et al. Inhibition of histone lysine-specific  
630 demethylase 1 elicits breast tumor immunity and enhances antitumor efficacy of immune  
631 checkpoint blockade. *Oncogene.* 2019;38(3):390-405.
- 632 62. Bally AP, Austin JW, Boss JM. Genetic and Epigenetic Regulation of PD-1 Expression. *J*  
633 *Immunol.* 2016;196(6):2431-7.
- 634 63. Chi T. A BAF-centred view of the immune system. *Nat Rev Immunol.* 2004;4(12):965-77.
- 635 64. Ni Z, Karaskov E, Yu T, Callaghan SM, Der S, Park DS, et al. Apical role for BRG1 in  
636 cytokine-induced promoter assembly. *Proc Natl Acad Sci U S A.* 2005;102(41):14611-6.
- 637 65. Shen J, Ju Z, Zhao W, Wang L, Peng Y, Ge Z, et al. ARID1A deficiency promotes  
638 mutability and potentiates therapeutic antitumor immunity unleashed by immune checkpoint  
639 blockade. *Nat Med.* 2018;24(5):556-62.
- 640 66. Naito T, Umemura S, Nakamura H, Zenke Y, Udagawa H, Kirita K, et al. Successful  
641 treatment with nivolumab for SMARCA4-deficient non-small cell lung carcinoma with a high tumor  
642 mutation burden: A case report. *Thorac Cancer.* 2019;10(5):1285-8.
- 643 67. Xia T, Konno H, Ahn J, Barber GN. Deregulation of STING Signaling in Colorectal  
644 Carcinoma Constrains DNA Damage Responses and Correlates With Tumorigenesis. *Cell Rep.*  
645 2016;14(2):282-97.
- 646 68. Curtis BJ, Zraly CB, Marendra DR, Dingwall AK. Histone lysine demethylases function as  
647 co-repressors of SWI/SNF remodeling activities during *Drosophila* wing development. *Dev Biol.*  
648 2011;350(2):534-47.

- 649 69. Hiramatsu H, Kobayashi K, Kobayashi K, Haraguchi T, Ino Y, Todo T, et al. Author  
650 Correction: The role of the SWI/SNF chromatin remodeling complex in maintaining the stemness  
651 of glioma initiating cells. *Sci Rep.* 2018;8(1):16079.
- 652 70. Schiavetti F, Thonnard J, Colau D, Boon T, Coulie PG. A human endogenous retroviral  
653 sequence encoding an antigen recognized on melanoma by cytolytic T lymphocytes. *Cancer Res.*  
654 2002;62(19):5510-6.
- 655 71. Improgo MR, Soll LG, Tapper AR, Gardner PD. Nicotinic acetylcholine receptors mediate  
656 lung cancer growth. *Front Physiol.* 2013;4:251.
- 657 72. Chiappinelli KB, Strissel PL, Desrichard A, Li H, Henke C, Akman B, et al. Inhibiting DNA  
658 Methylation Causes an Interferon Response in Cancer via dsRNA Including Endogenous  
659 Retroviruses. *Cell.* 2015;162(5):974-86.
- 660 73. Le DT, Uram JN, Wang H, Bartlett BR, Kemberling H, Eyring AD, et al. PD-1 Blockade in  
661 Tumors with Mismatch-Repair Deficiency. *N Engl J Med.* 2015;372(26):2509-20.
- 662 74. Leung DC, Lorincz MC. Silencing of endogenous retroviruses: when and why do histone  
663 marks predominate? *Trends Biochem Sci.* 2012;37(4):127-33.
- 664 75. Maksakova IA, Mager DL, Reiss D. Keeping active endogenous retroviral-like elements in  
665 check: the epigenetic perspective. *Cell Mol Life Sci.* 2008;65(21):3329-47.
- 666 76. Kassiotis G, Stoye JP. Immune responses to endogenous retroelements: taking the bad  
667 with the good. *Nat Rev Immunol.* 2016;16(4):207-19.
- 668 77. Szpakowski S, Sun X, Lage JM, Dyer A, Rubinstein J, Kowalski D, et al. Loss of epigenetic  
669 silencing in tumors preferentially affects primate-specific retroelements. *Gene.* 2009;448(2):151-  
670 67.
- 671 78. Sachs P, Ding D, Bergmaier P, Lamp B, Schlagheck C, Finkernagel F, et al. SMARCAD1  
672 ATPase activity is required to silence endogenous retroviruses in embryonic stem cells. *Nat*  
673 *Commun.* 2019;10(1):1335.

674 79. Leruste A, Tosello J, Ramos RN, Tauziede-Espariat A, Brohard S, Han ZY, et al. Clonally  
675 Expanded T Cells Reveal Immunogenicity of Rhabdoid Tumors. *Cancer Cell*. 2019;36(6):597-612  
676 e8.

677 80. Macfarlan TS, Gifford WD, Agarwal S, Driscoll S, Lettieri K, Wang J, et al. Endogenous  
678 retroviruses and neighboring genes are coordinately repressed by LSD1/KDM1A. *Genes Dev*.  
679 2011;25(6):594-607.

680

681

## 682 **Legends**

683

684 **Figure 1: LSD1 expression in tumors and SP-2577 toxicity in SWI/SNF mutated tumors. (A)**  
685 TCGA analysis for LSD1 expression in different human cancers. **(B)** TCGA analysis for LSD1  
686 expression in SWI/SNF-mutated tumors. **Table 1:** Cytotoxicity of SP-2577 and SP-2513 in  
687 SWI/SNF-mutated cancer cell lines. **Table 2:** Inhibition of LSD1 enzymatic activity of SP-2577  
688 and SP-2513.

689 **Figure 2: SP-2577 promotes ERVs expression and activation of IFN $\beta$  pathway in SCCOHT**  
690 **cell lines. (A)** qPCR analysis of SCCOHT cell lines BIN67, COV434 and SCCOHT-1 after 72h of  
691 SP-2577 treatment showing increased expression of ERVs and IFN pathway cytokines. **(B)** MSD  
692 panel of chemokines and cytokines from SCCOHT COV434 cell conditioned media in the  
693 presence or absence of SP-2577 for 72h. \*= $p < 0.05$ , \*\*= $p < 0.01$ .

694 **Figure 3: SP-2577 promotes lymphocytes infiltration in SCCOHT tumor organoids. (A)**  
695 Immune infiltration assay in SCCOHT organoids imaging analysis. COV434, BIN67 and  
696 SCCOHT-1 derived- organoids were incubated with conditioned medium pretreated with 3  $\mu$ M  
697 SP-2577, SP-2513 or DMSO in the presence of RFP-tagged PBMCs. After 48h the levels of

698 lymphocyte infiltration were measured by z-stack analysis by Cytation 5 imaging. P values for  
699 COV434= $<0.0001$ , BIN67 = 0.0016, and SCCOHT-1 = 0.0196. Right panel: Experimental design  
700 **(B)** IF analysis: RFP-tagged lymphocytes infiltration in SCCOHT organoids micro sections was  
701 assessed by analysis of RFP levels on confocal scope after 48h co-culture in presence of SP-  
702 2577 or SP-2513 conditioned medium. **(C)** Immune infiltration assay of COV434 cells treated with  
703 increased concentration of SP-2577 for 48h. The levels of lymphocytes infiltration correlate with  
704 SP-2577 dose.

705 **Figure 4: Flow cytometry analysis of the COV434 organoids after lymphocyte infiltration**  
706 **assay.** COV434 organoids were dissociated and the infiltrated lymphocytes were stained with  
707 different markers and analyzed in Flow Cytometry as described in materials and methods. Panel  
708 A and B are showing the status of lymphocytes infiltrated in DMSO control organoids and SP-  
709 2577 treated organoids respectively in the representative dot plots. **(Ai and Bi)** The dot plots  
710 showed the CD3+ population in CD45+ gated lymphocytes. **(Aii and Bii)** The status of CD4+ and  
711 CD8+ T cells gated on CD3+ cells are presented in different quadrants. **(Aiii and Biii)** Percentage  
712 of CD56+ NK in CD3+ cells are presented with quadrant statistics. **(Aiv and Biv)** The status of  
713 CD19+ B cells are shown in CD3+ cells.

714 **Figure 5: SP-2577 promotes PD-L1 expression and rescues checkpoint inhibition**  
715 **sensitivity in SCCOHT COV 434 cell line.** **(A)** RT-PCR analysis of COV434 cells after SP-2577  
716 treatment shows increase of PD-L1 expression levels, which are lost after Doxycycline treatment.  
717 **(B)** Co-treatment of SCCOHT organoids with SP-2577 and anti PD-L1 antibodies and  
718 lymphocytes treated with anti CTLA-4 antibodies showed an increase in lymphocyte infiltration as  
719 checked after 48h.

720 **Figure 6: SMARCA4 re-expression in SCCOHT cell lines blocks lymphocyte infiltration.**

721 (A) Densitometry analysis of western blot for SMARCA4 expression level in COV434 pIND20  
722 BRG1-2.7 after 1 $\mu$ M Doxycycline daily treatment (D=days) (B) RT-PCR for BRG1 and BRM  
723 expression levels in COV434 pIND20 BRG1-2.7. Both gene expression increased after SP-2577  
724 treatment. (C) The levels of lymphocyte infiltration are significantly reduced after SMARCA4 re-  
725 expression in COV434 pIND20 BRG1-2.7 (P value = 0.038). (D) RT-PCR analysis of SMARCA4-  
726 induced COV434 pIND20 BRG1-2.7 after 72h SP2577 treatment shows decrease of ERVs activity  
727 and INF expression. (E) RT-PCR analysis of COV434 cells after SP-2577 treatment shows  
728 increase of PD-L1 expression levels, which are lost after Doxycycline treatment (F) MSD analysis  
729 of SMARCA4-induced COV434 pIND20 BRG1-2.7 after 72h SP-2577 treatment shows significant  
730 decrease of cyto/chemokines released in medium after treatment. (G) Treatment of SMARCA4-  
731 induced COV434 pIND20 BRG1-2.7 organoids with conditioned medium (CM) from SMARCA4-  
732 deficient COV434 pIND20 BRG1-2.7 does not affect lymphocyte infiltration suggesting SMARCA4  
733 plays role in immune response. Left panel: Experimental design.

734 **Figure 7: SP-2577 promotes lymphocyte infiltration in ARID1A deficient cells.**(A) level of  
735 lymphocytes infiltration is dependent of SP-2577 treatment in TOV21G pIND20-ARID1A cells line.  
736 (B) lymphocytes infiltration is significantly reduced in TOV21G pIND20-ARID1A cells after  
737 ARID1A re-expression upon Doxycycline treatment (P value = 0.004). (C) co-treatment of SP-  
738 2577 and CTLA-4 antibodies in the immune infiltration assay showed an increase in lymphocyte  
739 infiltration in TOV21G-pIND20-ARID1A after 48h.

740

TCGA KDM1A Expression

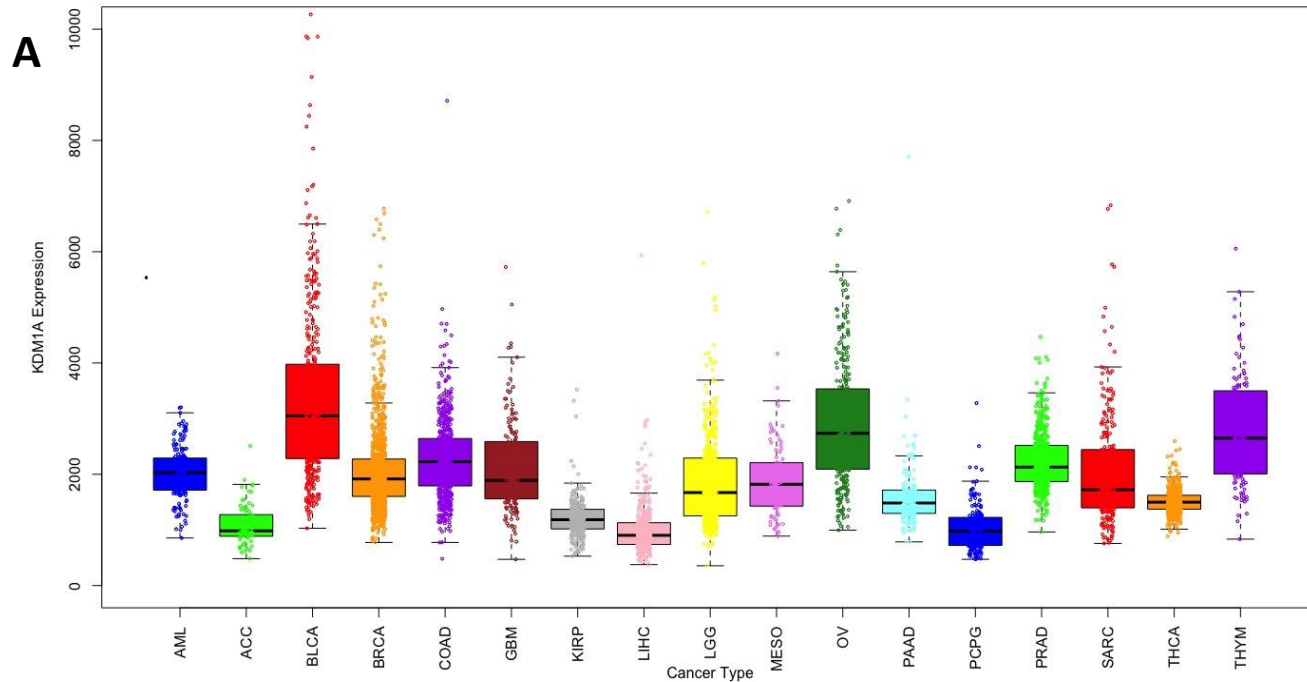

TCGA SWI/SNF Wild Type vs SWI/SNF Mutant KDM1A Expression

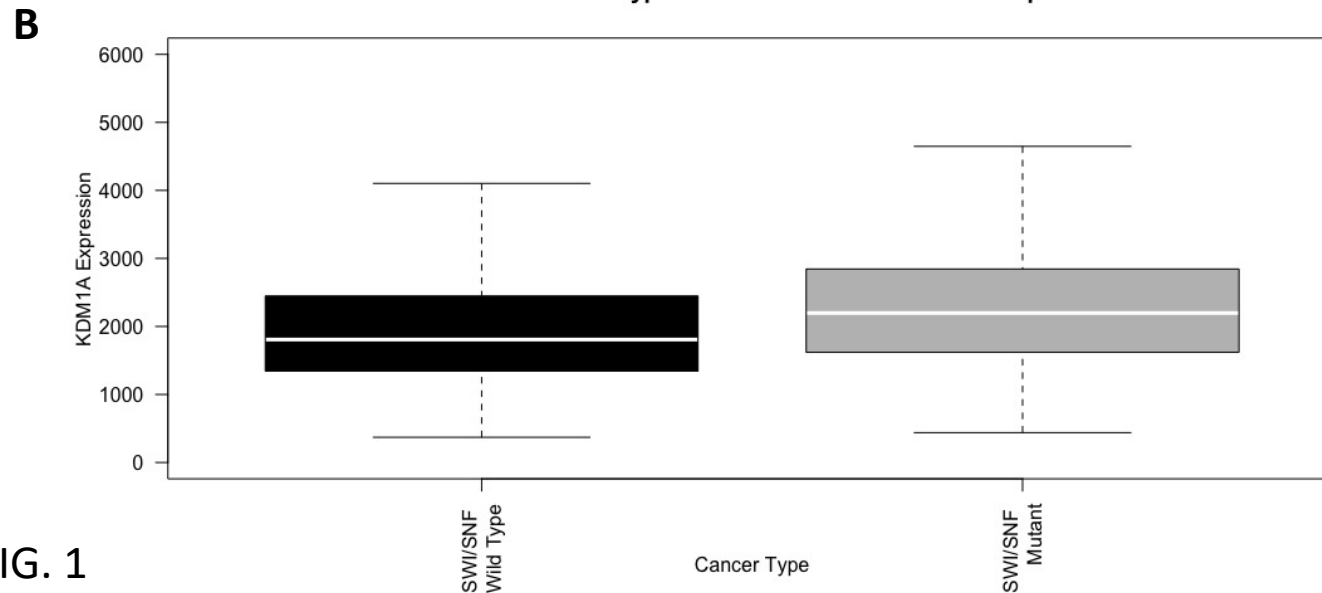

FIG. 1

Table 1

| Cell line | Cancer type               | Drug IC <sub>50</sub> (μM) |         | SWI/SNF mutation |
|-----------|---------------------------|----------------------------|---------|------------------|
|           |                           | SP-2577                    | SP-2513 |                  |
| COV434    | SCCOHT                    | 0.529                      | 9.985   | SMARCA4          |
| BIN67     | SCCOHT                    | 0.417                      | 10      | SMARCA4          |
| SCCOHT-1  | SCCOHT                    | 1.098                      | 3.65    | SMARCA4          |
| TOV21G    | OCCC                      | 0.203                      | 24.54   | ARID1A           |
| SKOV3     | Ovary ADC                 | 0.013                      | ---     | SMARCC1          |
| A427      | Lung ADC                  | 0.1422                     | ---     | SMARCA4          |
| H522      | Lung ADC nsl              | 2.819                      | ---     | SMARCA4          |
| A549      | Lung ADC                  | 0.248                      | ---     | SMARCA4          |
| H1299     | Lung ADC nsl              | 0.212                      | ---     | SMARCA4          |
| G401      | Kidney Rhabdoid           | 0.3874                     | ---     | SMARCB1          |
| G402      | Kidney renal leiomyoblast | 1.179                      | ---     | SMARCB1          |
| HCC15     | CRC                       | 0.117                      | ---     | SMARCA4          |

Table 2

| Drug    | IC <sub>50</sub> (μM) |
|---------|-----------------------|
| SP-2577 | 0.013                 |
| SP-2513 | >1                    |

LSD1 screening biochemical assay

**A**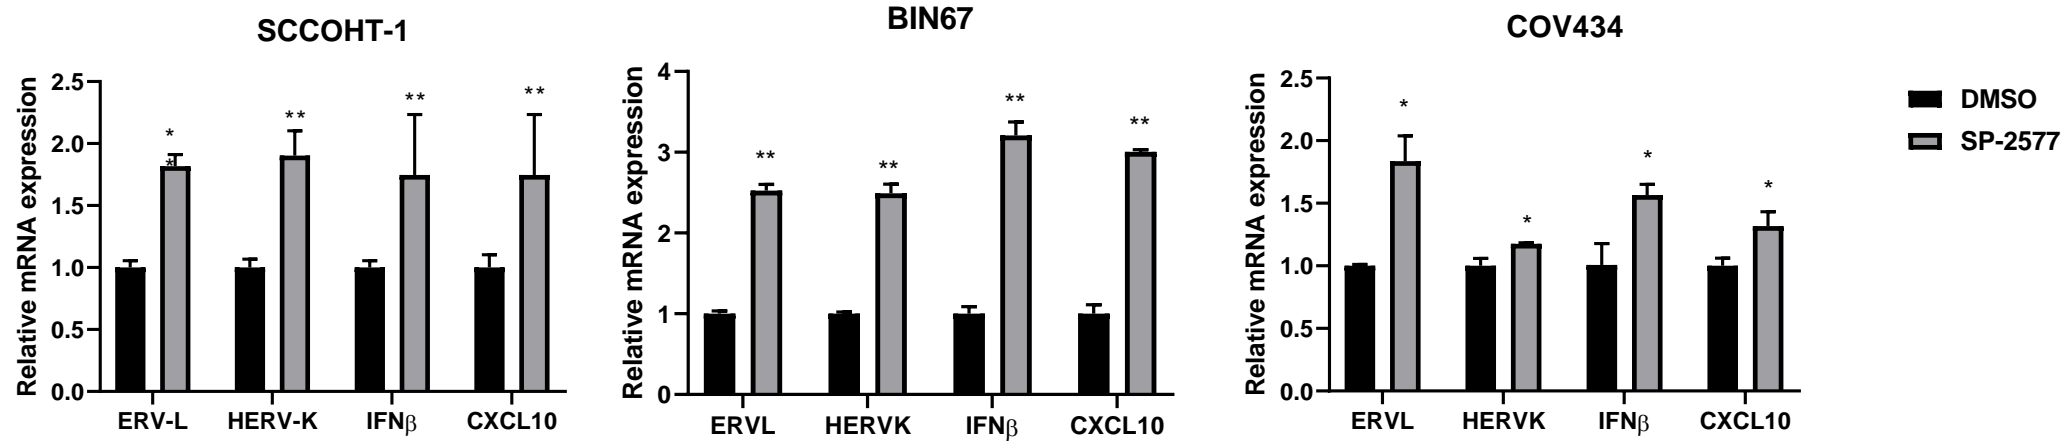**B**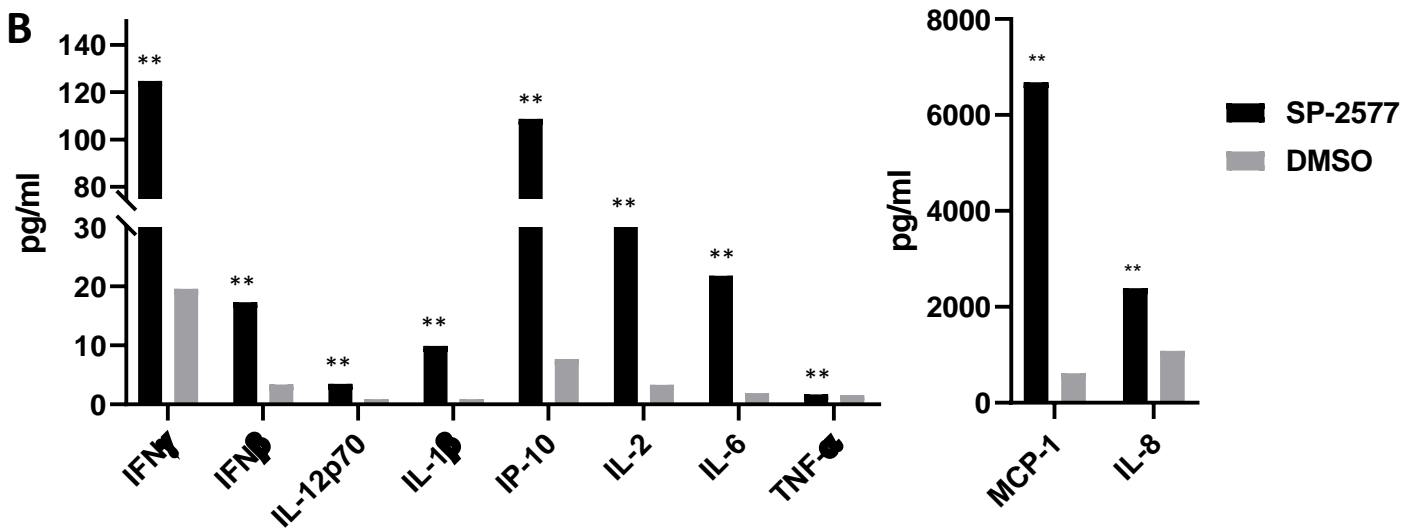

FIG. 2



**A**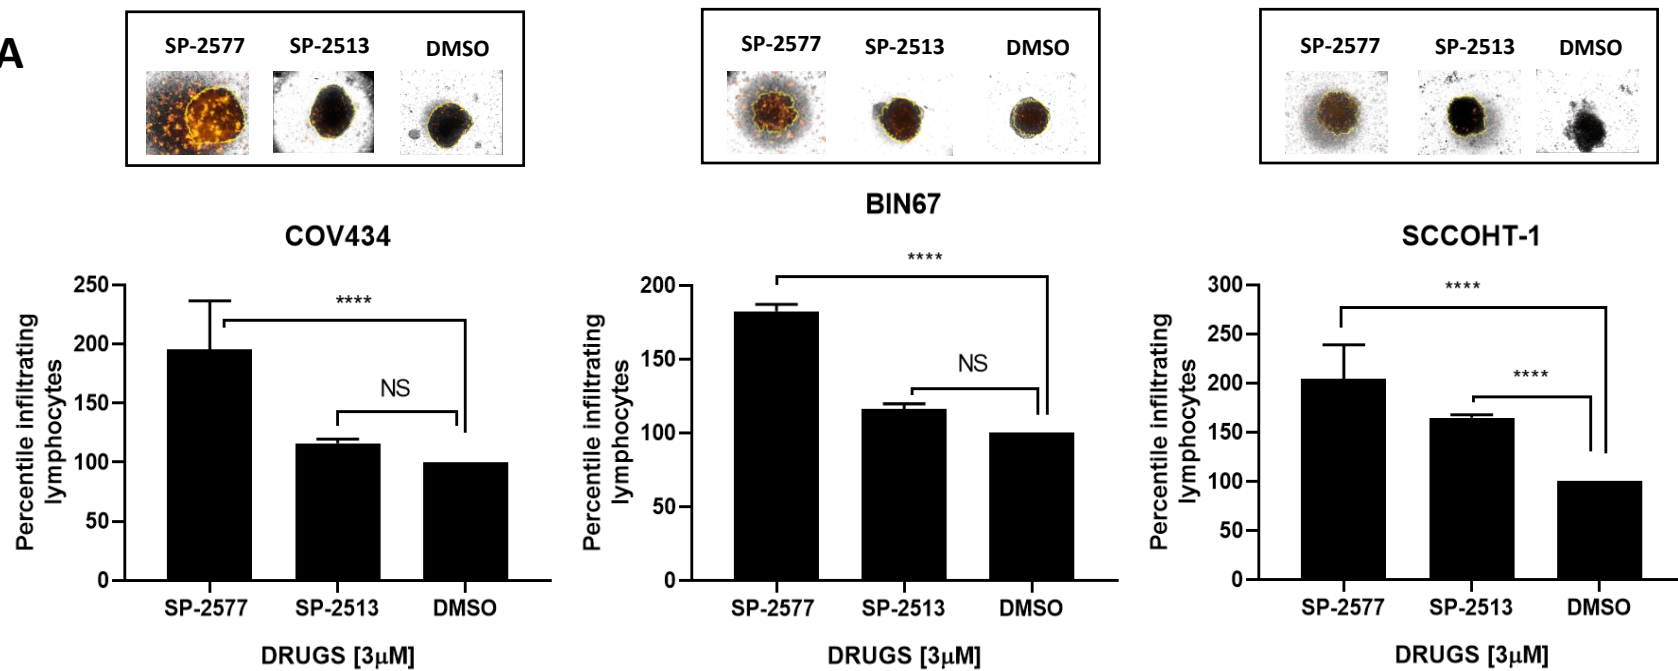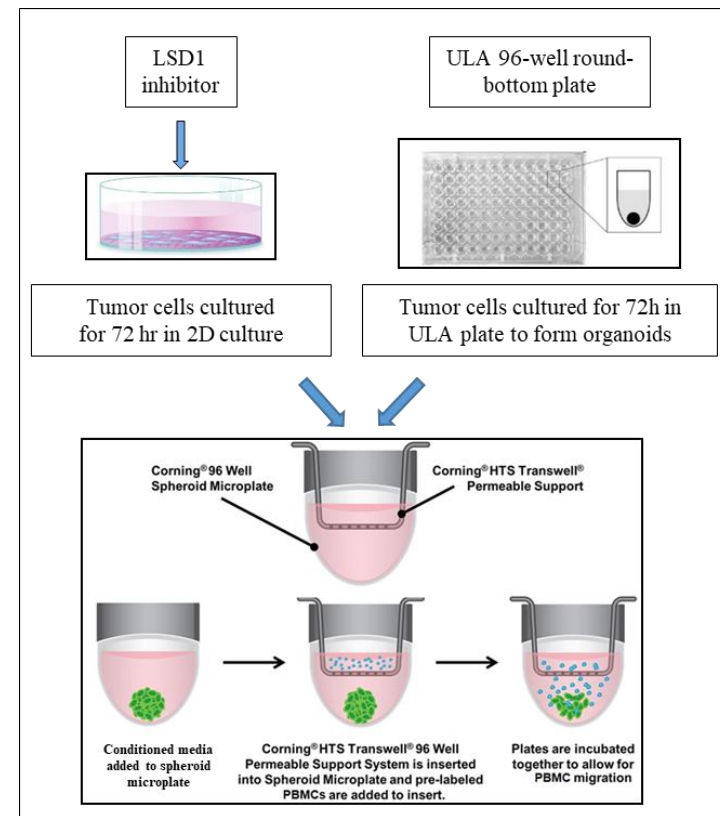**B**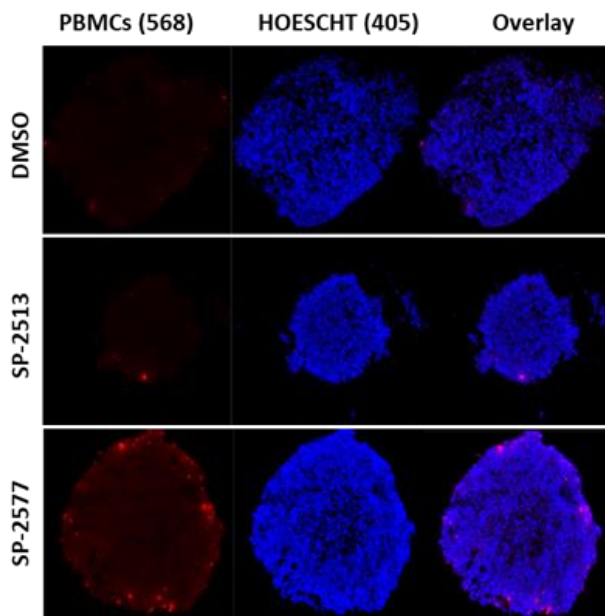**C**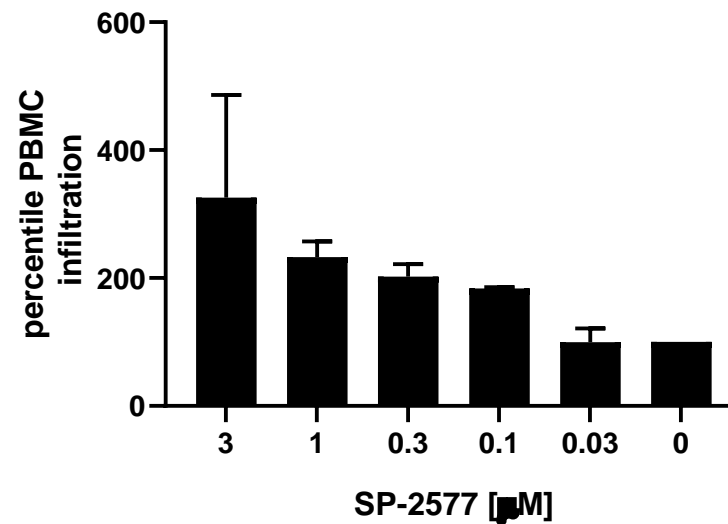

FIG. 3

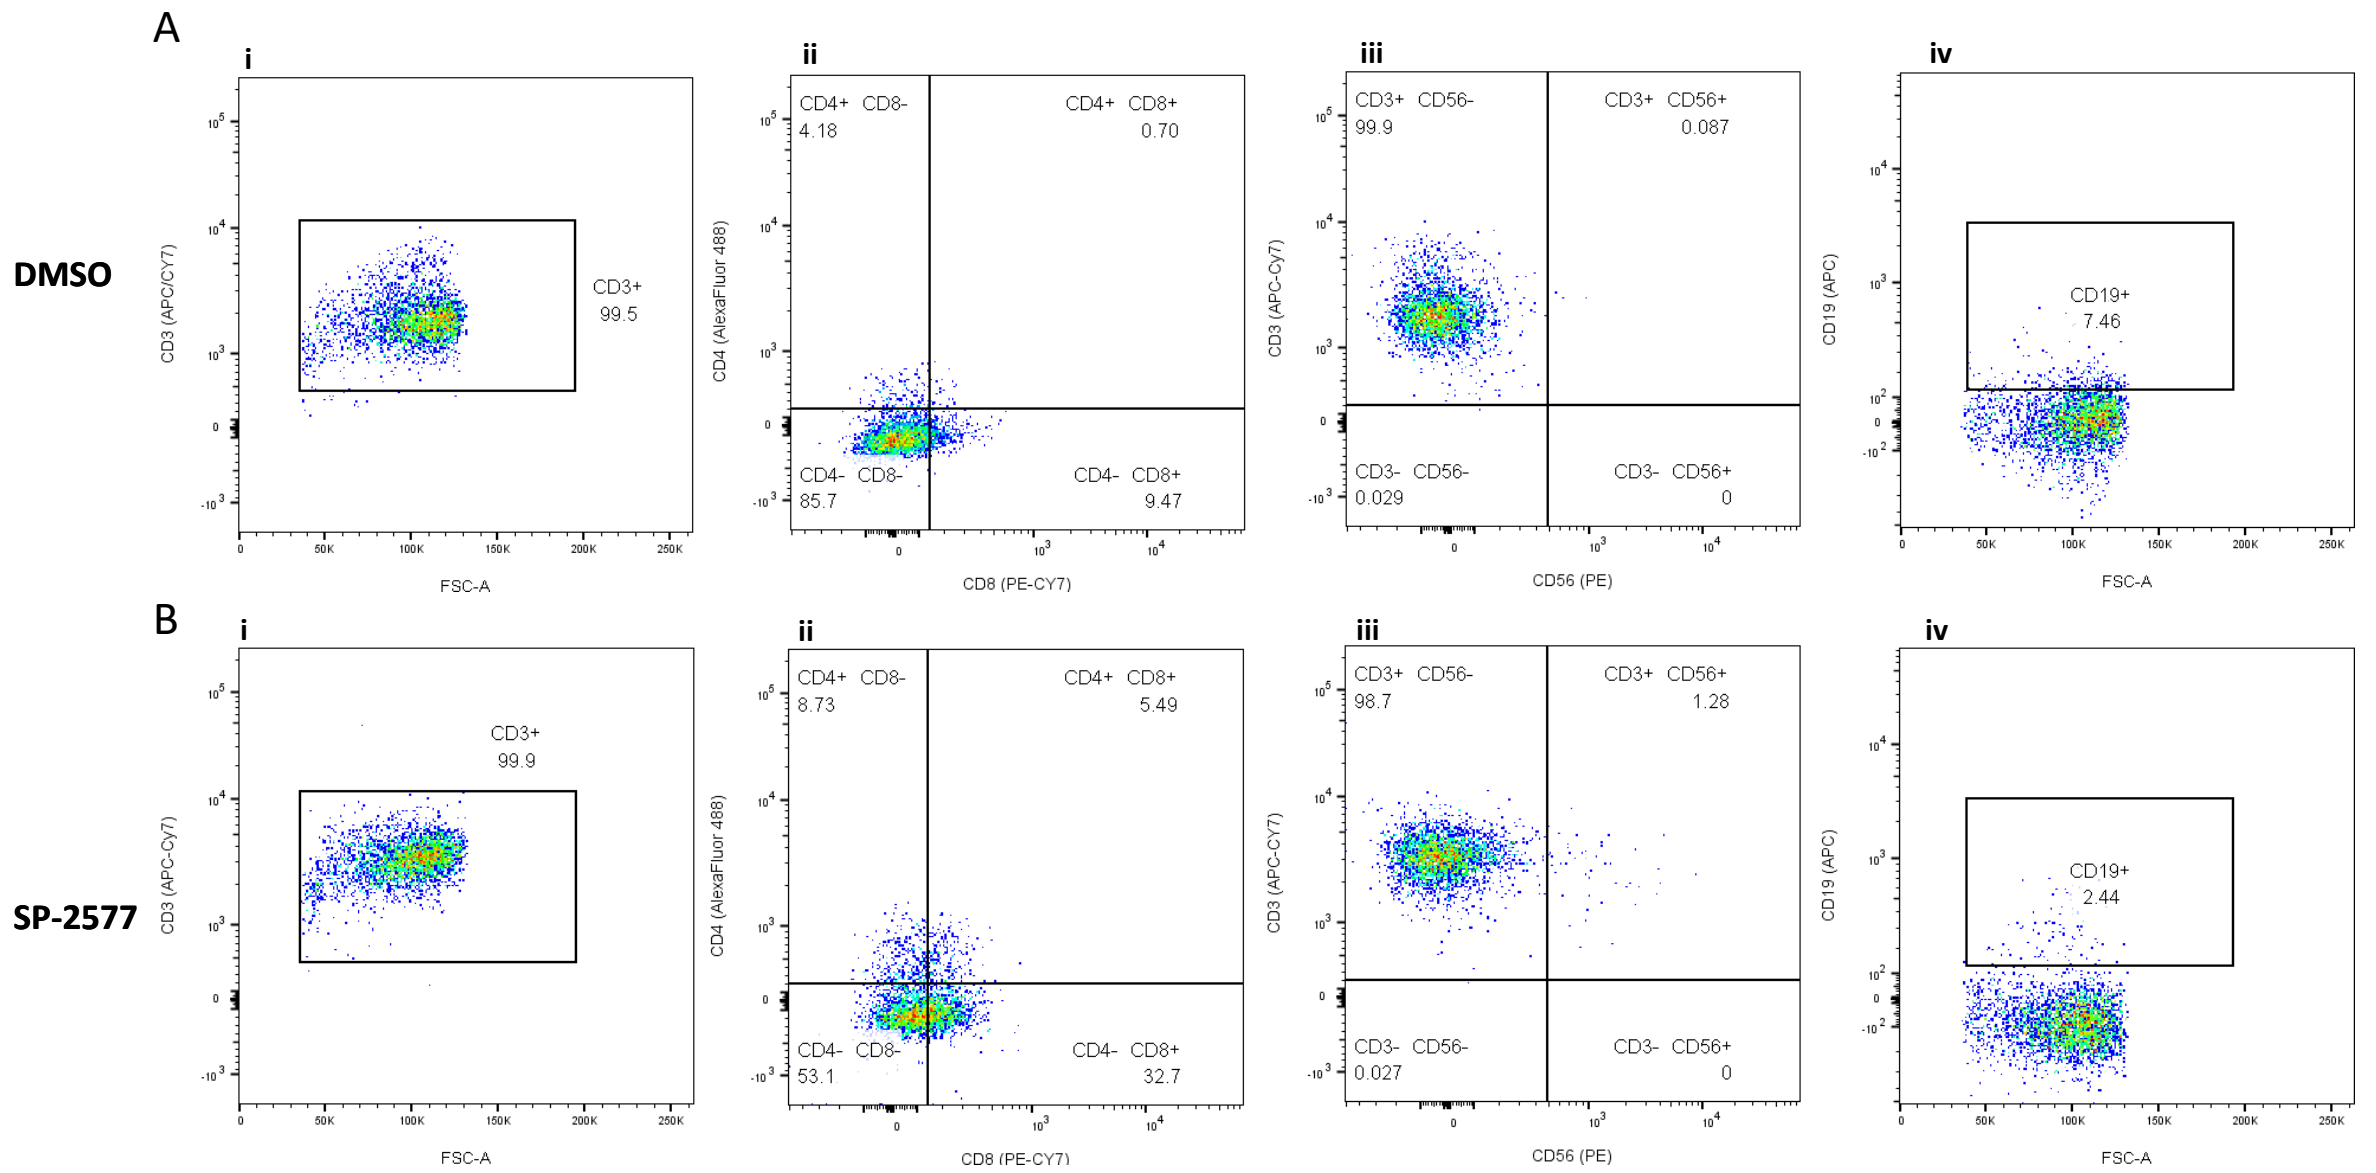

FIG. 4

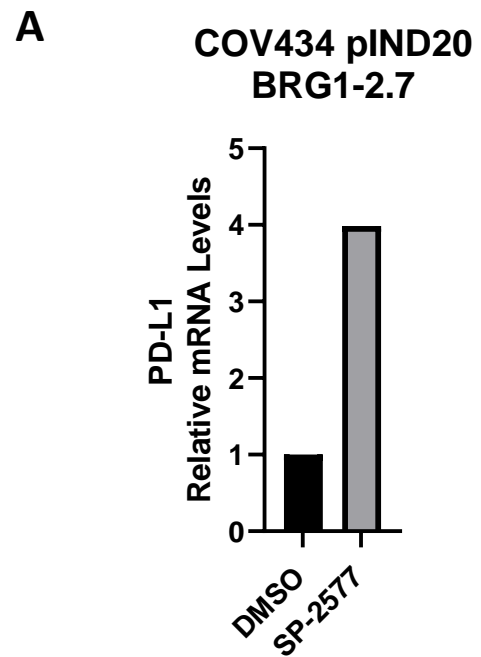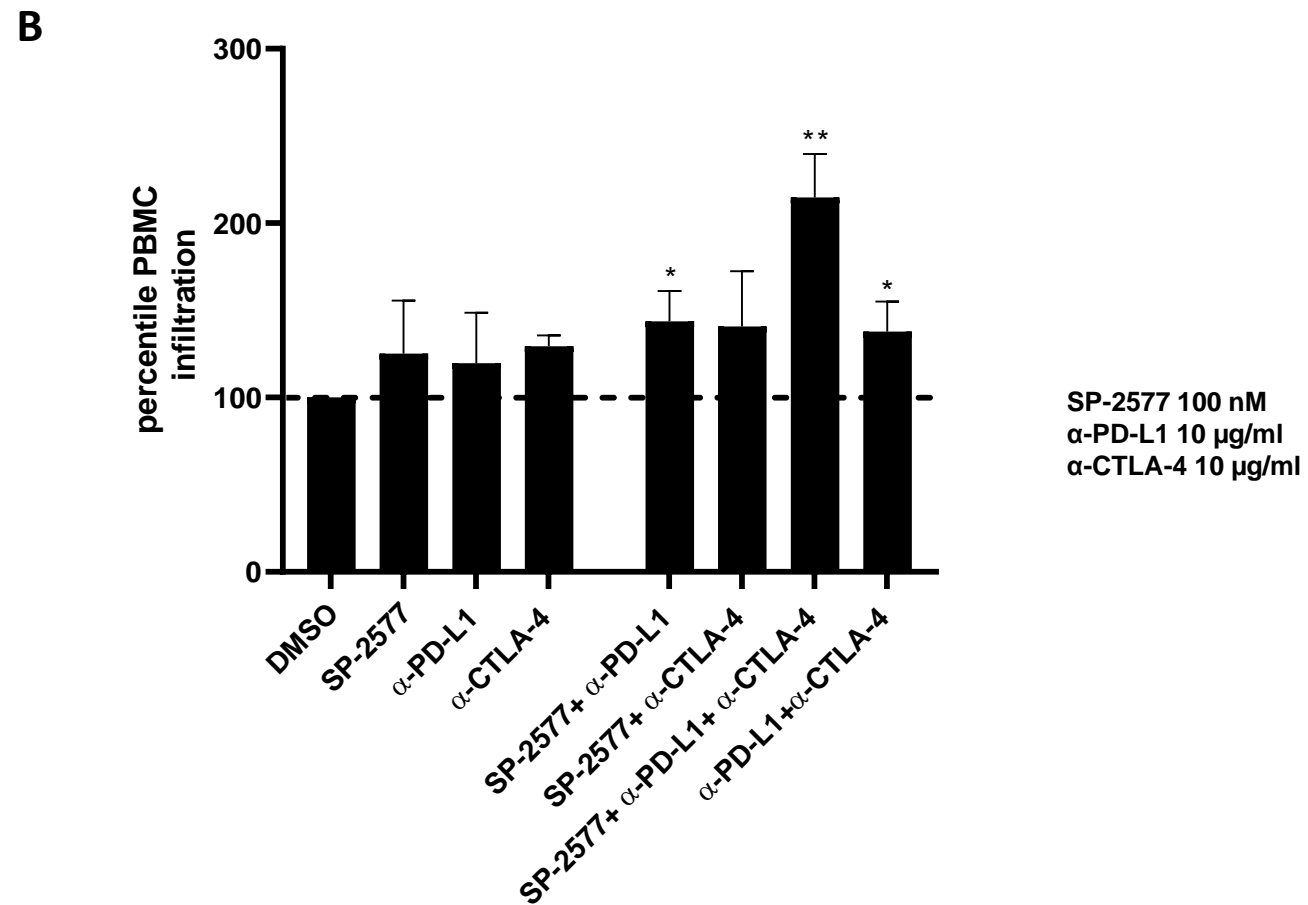

FIG. 5

**A**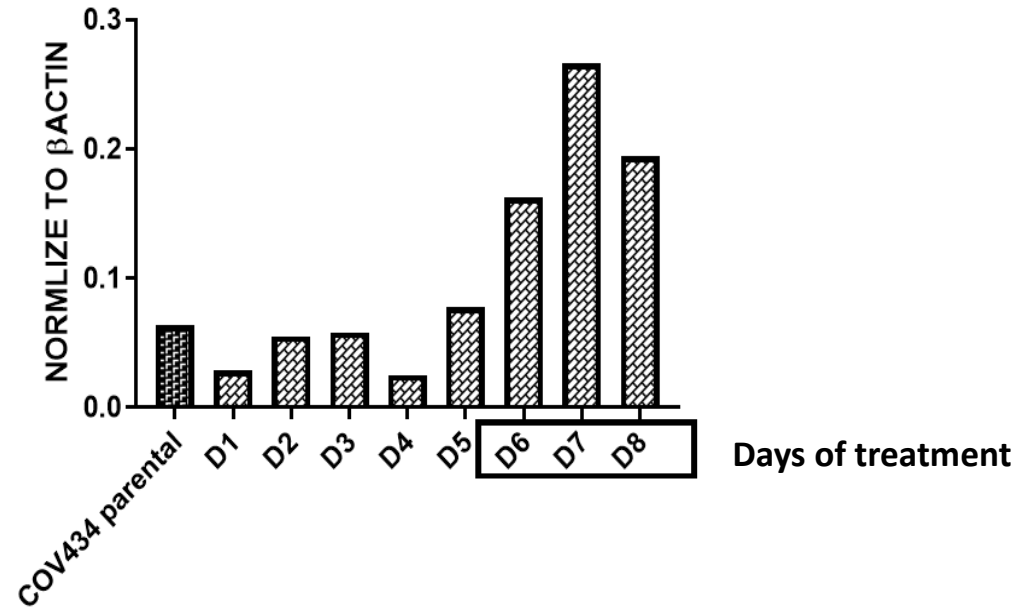**B**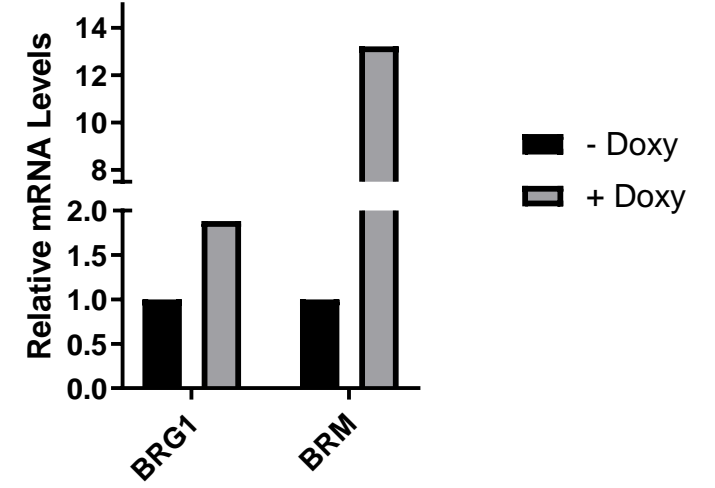**C**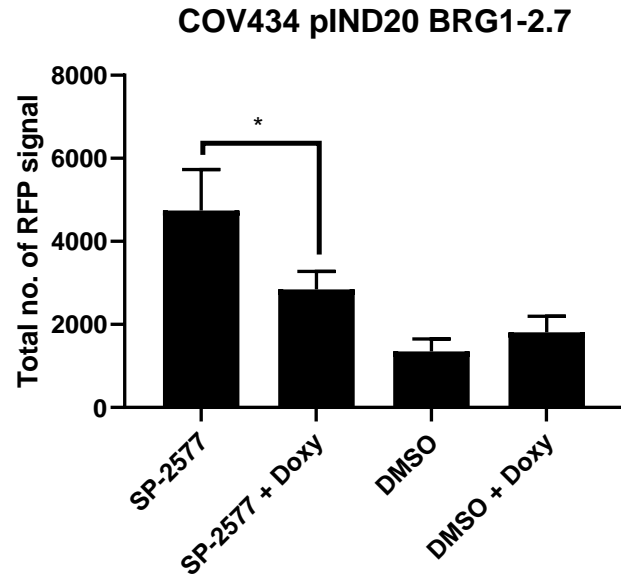**D**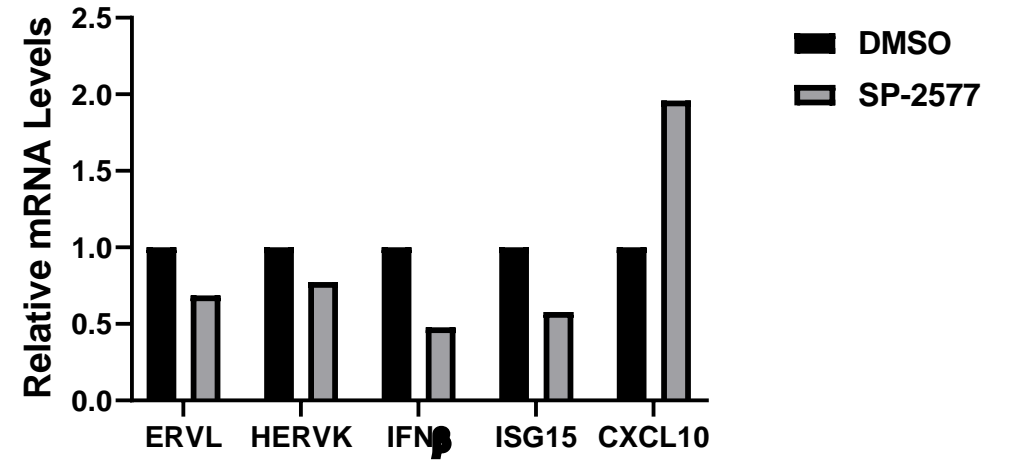

FIG. 6

E

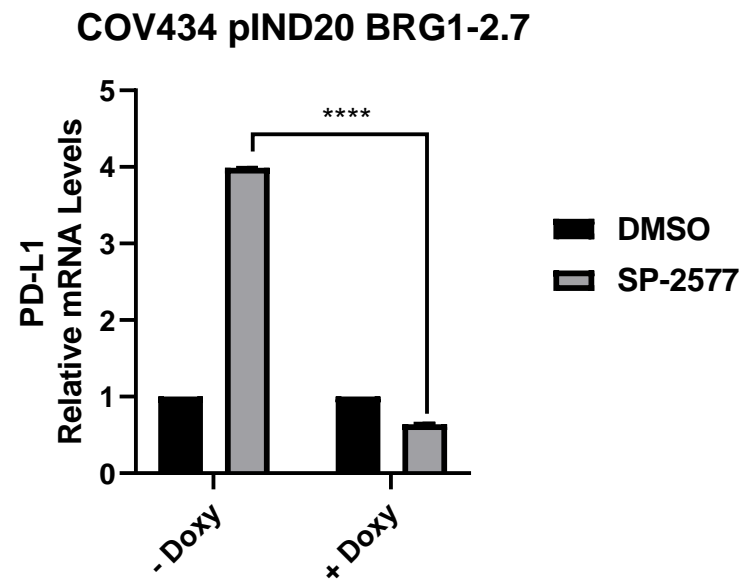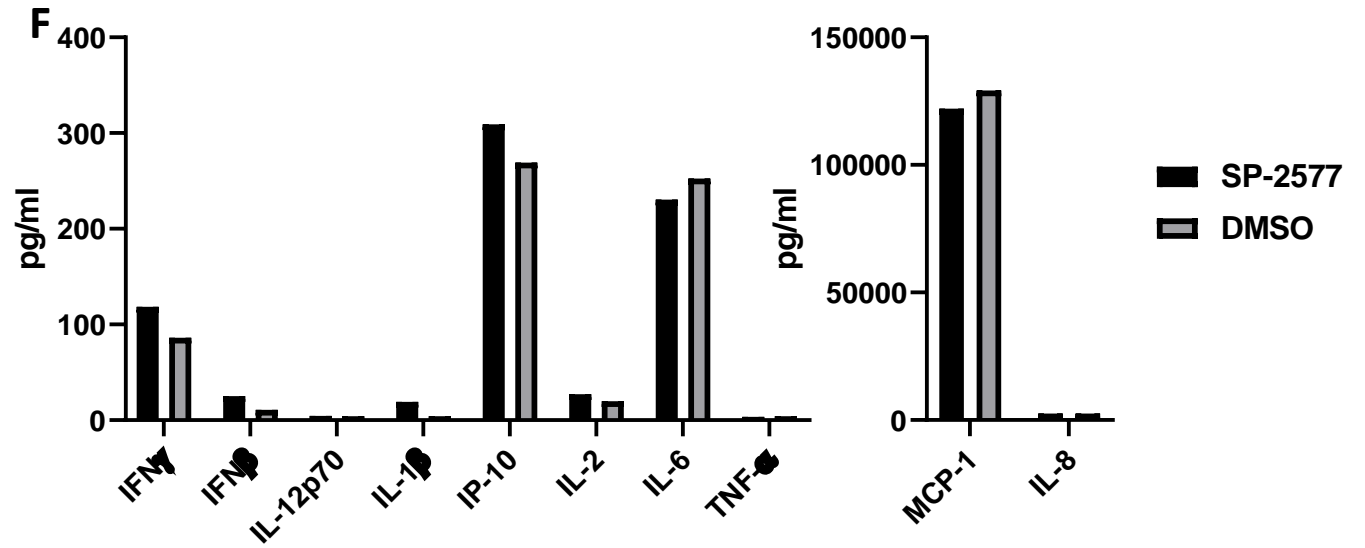

G

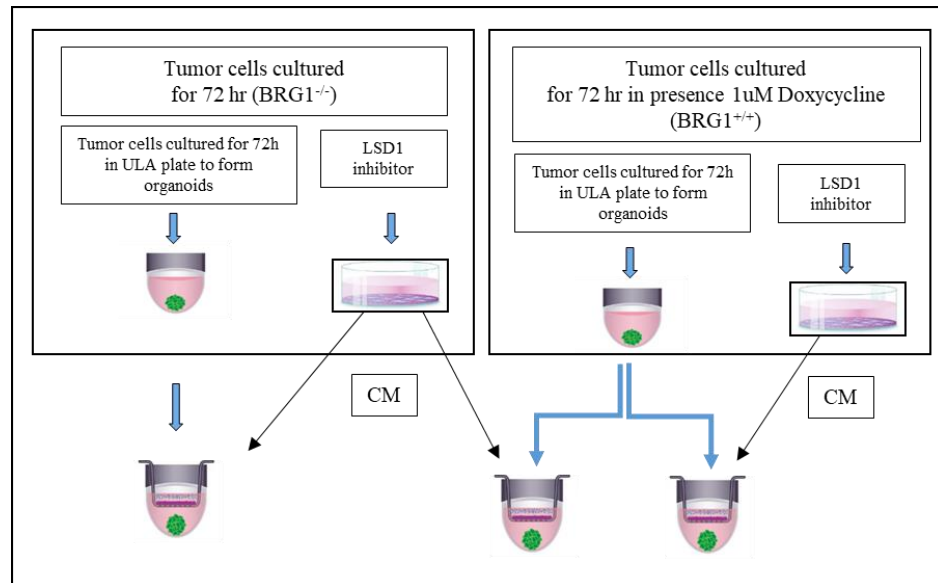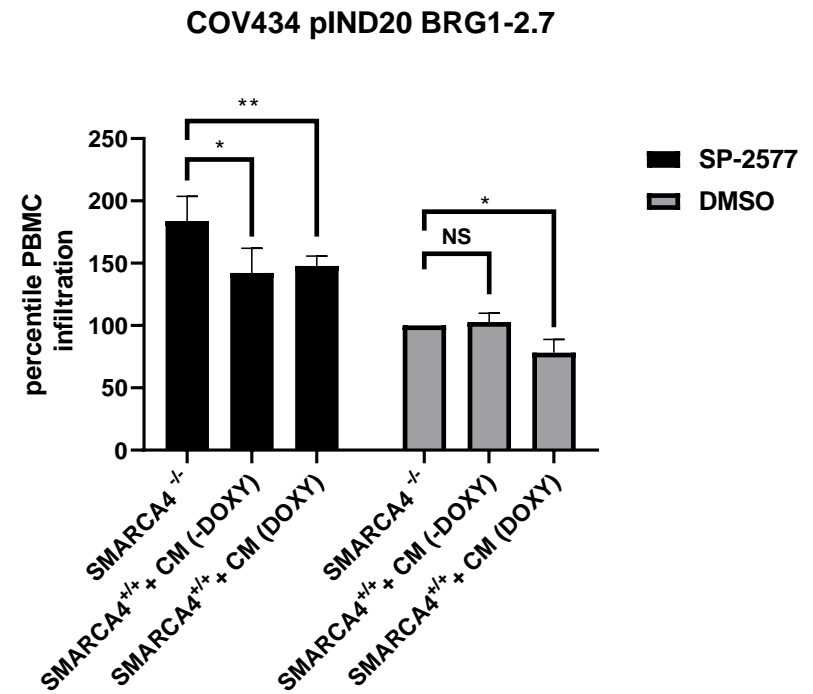

FIG. 6

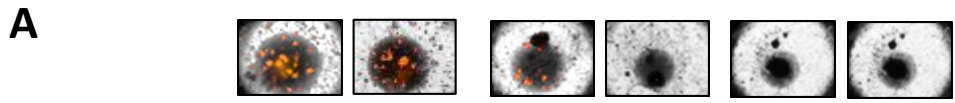

TOV21G-pIND20-ARID1A

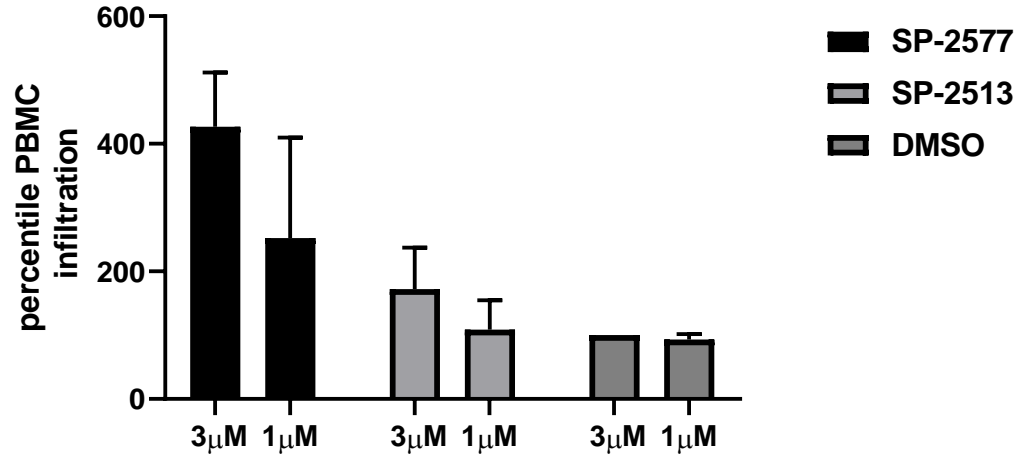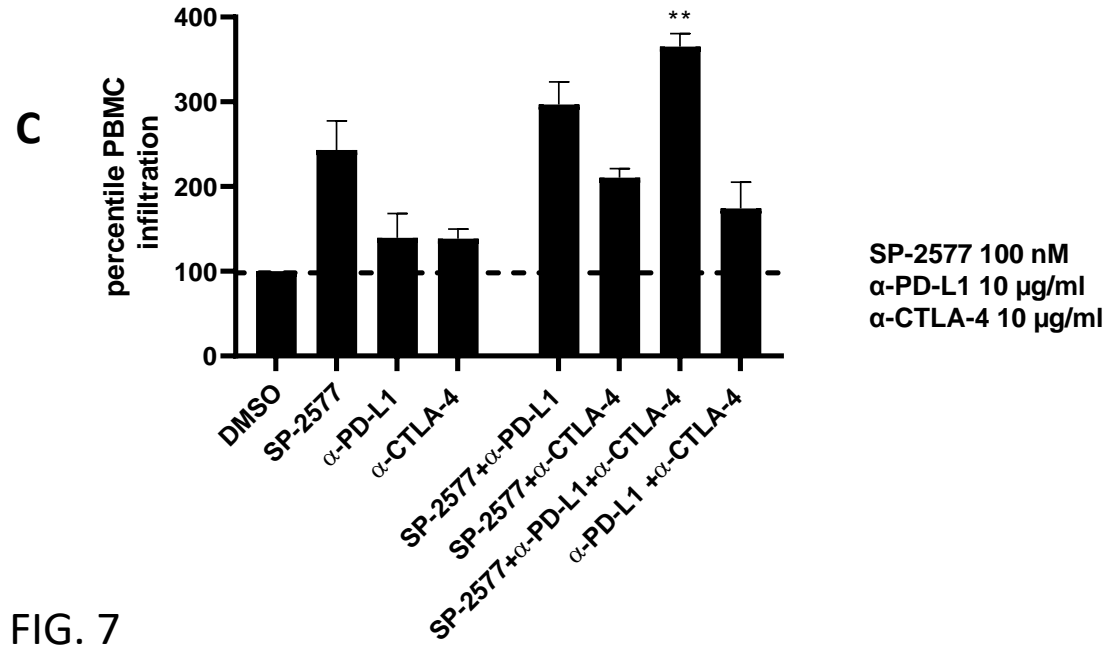

**B**

TOV21G-pIND20-ARID1A

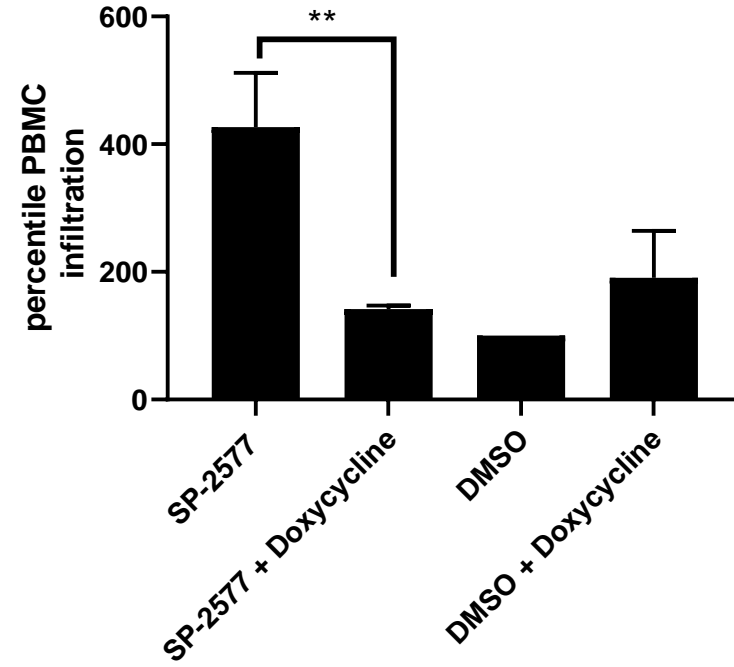

FIG. 7
